# 1 Gating TrkB switch by methylglyoxal enables GLO1 as a 2 target for depression 3

4 Ziyin Wu<sup>1,2,3†</sup>, Yingxue Fu<sup>2,3†</sup>, Yinfeng Yang<sup>3,4†</sup>, Chao Huang<sup>2,3†</sup>, Chunli Zheng<sup>1,3†</sup>, Zihu Guo<sup>1,3†</sup>, Zihao  
5 Yang<sup>6</sup>, Xuotong Chen<sup>2,3</sup>, Jinglin Zhu<sup>1,3</sup>, Jinghui Wang<sup>4</sup>, Xiaogang Li<sup>1,3</sup>, Liyang Chen<sup>2,3</sup>, Weiwei Zhou<sup>3,5</sup>,  
6 Yangyang Chen<sup>2,3</sup>, Jiangmei Wang<sup>2,3</sup>, Yang Yang<sup>3,5</sup>, Meng Jiang<sup>1,3</sup>, Sushing Chen<sup>7</sup>, Aiping Lu<sup>8</sup>, Jianlin Liu<sup>1</sup>,  
7 Yan Li<sup>4</sup>, Shiguo Sun<sup>6</sup>, Zhenzhong Wang<sup>3</sup>, Wei Xiao<sup>3\*</sup>, Yonghua Wang<sup>1,3\*</sup>

8  
9 <sup>1</sup>Lab of Systems Pharmacology, College of Life Sciences, Northwest University, Xi'an, Shaanxi 710069,  
10 China.

11 <sup>2</sup>Center of Bioinformatics, College of Life Sciences, Northwest A&F University, Yangling, Shaanxi 712100,  
12 China.

13 <sup>3</sup>State Key Laboratory of New-tech for Chinese Medicine Pharmaceutical Process, Lianyungang, Jiangsu  
14 222001, China.

15 <sup>4</sup>Key Laboratory of Industrial Ecology and Environmental Engineering (MOE), Department of Materials  
16 Sciences and Chemical Engineering, Dalian University of Technology, Dalian, Liaoning 116024, China.

17 <sup>5</sup>Pharmacology department, School of Pharmacy, Shihezi University, Shihezi 832002, China.

18 <sup>6</sup>Shaanxi Key Laboratory of Natural Products & Chemical Biology, College of Chemistry & Pharmacy,  
19 Northwest A&F University, Yangling, Shaanxi 712100, China.

20 <sup>7</sup>Systems Biology Laboratory, Department of Computer Information Science and Engineering, University  
21 of Florida, Gainesville, Florida, United States of America.

22 <sup>8</sup>School of Chinese Medicine, Hong Kong Baptist University, Kowloon Tong, Hong Kong.

23 †These authors contributed equally to this work.

24 \*Correspondence should be addressed to Yonghua Wang ([yhwang@nwu.edu.cn](mailto:yhwang@nwu.edu.cn)) and Wei Xiao  
25 ([xw\\_kanion@163.com](mailto:xw_kanion@163.com)).

26

27

28

29 **Abstract**

30 Major depressive disorder (MDD) is a severe psychiatric illness that affects about 16 percent of the global  
31 population. Despite massive efforts, unravelling the pathophysiology of MDD and developing effective  
32 treatments is still a huge challenge. Here, we report a novel therapeutic axis of methylglyoxal  
33 (MGO)/tropomyosin receptor kinase B (TrkB) for treating MDD. As an endogenous metabolite, MGO was  
34 demonstrated directly binding to the extracellular domain of TrkB, provoking its dimerization and  
35 autophosphorylation. This rapidly enhances the expression of brain-derived neurotrophic factor (BDNF)  
36 and forms a BDNF-positive feedback loop. Low-dose treatment of MGO effectively promotes the  
37 hippocampal neurogenesis and exhibits sustained antidepressant effects in chronic unpredictable mild  
38 stress rat models. In addition, the modulation on MGO concentration by overexpression or inhibition of  
39 Glyoxalase 1 (GLO1) has been demonstrated associated with depression behaviors in rats. Furthermore,  
40 we also identified a natural product luteolin and its derivative lutD as potent inhibitors of GLO1 and explored  
41 their precise binding modes. Our findings reveal a novel regulatory mechanism underlying MDD and depict  
42 principles for the rational design of new antidepressants targeting GLO1.

43

44

45 **Significance Statement**

46 Methylglyoxal (MGO) is an endogenous reactive dicarbonyl metabolite which is often involved in disease  
47 conditions by reacting with cellular components and causing oxidative stress. While high concentrations  
48 of MGO exert toxicity resulting in aging and diabetic neuropathy, we here find that MGO levels are  
49 remarkably decreased in depression rats, and low-dose MGO treatment alleviates depression-like  
50 symptoms and promotes the hippocampal neurogenesis. This unexpected effect is achieved by MGO's  
51 modification of TrkB and the subsequent activation of downstream Akt/CREB signaling, which leads to a  
52 rapid and sustained expression of BDNF. The antidepressant role of endogenous MGO provides a new  
53 basis for the design of therapeutic interventions for major depressive disorder.

54

55

56 **Key Words**

57 Depression; Methylglyoxal; BDNF/TrkB signaling; Hippocampal neurogenesis; Antidepressant

58

## 59 Introduction

60 Major depressive disorder (MDD) is a common, devastating illness associated with serious health and  
61 socioeconomic consequences (1). Increasing evidence has associated this disease with impairments in  
62 the brain-derived neurotrophic factor (BDNF) signaling pathway which regulate neuronal survival and  
63 synaptic plasticity (2, 3). BDNF is an important member of the neurotrophin family, which binds to the  
64 tropomyosin receptor kinase B (TrkB) (4) to regulate neuronal proliferation and differentiation in the  
65 nervous system (5-7). In MDD patients, the expression of BDNF in the prefrontal cortex (PFC) and  
66 hippocampus (HC), as well as in the plasma, is markedly decreased (6, 8). One cause for the reduced  
67 BDNF levels is due to BDNF/TrkB signaling dysfunction mediated by endogenous small molecules, such  
68 as the N-methyl-D-aspartate (NMDA) (9). However, whether there are other endogenous metabolic  
69 molecules involved in regulating BDNF/TrkB signaling under depressive state is still largely unknown.

70

71 Methylglyoxal (MGO) is an endogenous metabolite mainly generated in the glycolysis process (10). It is a  
72 highly reactive dicarbonyl aldehyde, which can react with protein arginine and/or lysine residues to form  
73 advanced glycation end-products (AGEs), and cause non-enzymatic, post-translational modifications of  
74 proteins (11, 12). High concentrations of MGO exert cytotoxic effects via evoking the production of reactive  
75 oxygen species (13), and have been implicated in pathologies of several diseases including diabetes (14),  
76 aging (15) and neurodegenerative diseases (16). Nevertheless, under normal conditions, MGO can be  
77 efficiently detoxified by the glyoxalase system, mainly through Glyoxalase 1 (GLO1), an enzyme catalyzing  
78 the conversion of acyclic  $\alpha$ -oxoaldehydes to corresponding  $\alpha$ -hydroxyacids (17). Recently, GLO1 has been  
79 identified associated with anxiety- and depression-like behaviors in mice (18, 19). This suggests that MGO  
80 may play a potential role in the pathophysiology of depression. However, the cellular function of MGO at  
81 physiological concentration and its precise mechanism of action in depression still remain poorly  
82 understood.

83

84 In this study, we report that MGO functions as an endogenous agonist of TrkB by directly binding to its  
85 extracellular domain (ECD) to stimulate its dimerization and autophosphorylation. This enables MGO to  
86 switch on the BDNF/TrkB signaling, manipulating a fast and sustained activation effect through forming a  
87 BDNF-positive feedback loop. We further demonstrate that MGO can effectively promote the hippocampal  
88 neurogenesis and exhibit antidepressant effects in chronic unpredictable mild stress (CUMS) rat model.  
89 Moreover, we have screened out a natural product luteolin, which selectively binds to GLO1 and exerts  
90 desirable antidepressant effects. Further, the key residues of the binding pocket between luteolin and  
91 GLO1, i.e., E99, F62 and Q33 were determined.

92

## 93 Results

### 94 GLO1 has negative regulation effects on BDNF/TrkB signaling pathway.

95 To systematically identify those genes that are associated with MDD, we performed a differential  
96 coexpression analysis on a publicly available gene expression profiling of brain samples from 34 MDD

97 patients and 55 normal individuals (GSE45642) (**Supplementary Fig. S1A**) (20). Firstly, the differentially  
98 coexpressed genes (DCGs) of six brain areas, i.e., the dorsolateral PFC (DLPFC), anterior cingulate cortex  
99 (AnCg), HC, amygdala (AMY), nucleus accumbens (NAcc) and cerebellum (CB) were obtained using an  
100 improved weighted correlation network analysis (I-WGCNA) approach (21) (see Methods, **Supplementary**  
101 **Table S1**). Pathway enrichment analysis of the six DCG sets against KEGG database identified the  
102 'neurotrophin signaling pathway' as one of the most significantly enriched pathways in the DLPFC, AnCg,  
103 HC and NAcc areas (**Supplementary Fig. S1B**). Then, by employing the gene set enrichment analysis  
104 (GSEA) algorithm, a panel of genes like NGF and BDNF were identified associating with this pathway,  
105 which is consistent with their neurotrophic roles (22). Notably, among them, a homodimeric zinc  
106 metalloenzyme GLO1 was found significantly correlated with the BDNF/TrkB signaling pathway in the  
107 DLPFC, HC, NAcc and CB areas of these samples (**Fig. 1A and Supplementary Fig. S1C**). All analyses  
108 raise an interesting assumption that GLO1 may be involved in regulating the BDNF/TrkB signaling in the  
109 DLPFC, HC and NAcc areas of MDD patients.

110 To test this, two independent, non-overlapping short hairpin RNA (shRNA) lentiviral constructs were  
111 designed to knock down GLO1 in PC12 cells (**Supplementary Table S2**). The levels of GLO1 protein and  
112 its mRNA were significantly down-regulated in both of the shRNA groups (**Figs. 1B and 1D**). We then  
113 tested whether this knockdown impacts the signaling transduction of BDNF/TrkB pathway. The results  
114 show that the expression levels of BDNF protein and its mRNA were both obviously enhanced (**Figs. 1C**  
115 **and 1D**). Correspondingly, silencing of GLO1 increased the levels of p-TrkB, p-Akt, p-ERK1/2 and p-CREB  
116 (**Fig. 1E**), indicating the activation of Akt and ERK signaling pathways, which are important downstream  
117 signals that regulate the neuronal survival and local axon growth (23). Additionally, the pharmacological  
118 inhibition of GLO1 by 10  $\mu$ M S-p-bromobenzyglutathione cyclopentyl diester (BBGC) in WT PC12 cells  
119 also resulted in an enhancement of TrkB signaling (**Supplementary Fig. S2A**). Reciprocally, the  
120 overexpression of GLO1 in PC12 cells significantly increased both the protein and mRNA levels of GLO1  
121 (**Fig. 1F and Supplementary Fig. S2B**). And this led to a reduction of p-TrkB, p-Akt, p-ERK1/2 and p-  
122 CREB levels, as well as the protein and mRNA levels of BDNF (**Figs. 1G, 1H and Supplementary Fig.**  
123 **S2B**), indicating that GLO1 overexpression causes functional inhibition of BDNF/TrkB signaling. All these  
124 data strongly support the speculation that GLO1 has negative regulation effects on BDNF/TrkB signaling  
125 pathway.

126

### 127 **MGO functions as a TrkB agonist and induces a fast and sustained BDNF/TrkB signaling.**

128 Considering that the concentrations of MGO can be controlled by GLO1 (10), and GLO1 negatively  
129 regulates the BDNF/TrkB signaling, we hypothesize that MGO may positively modulate this signaling  
130 pathway, and in this way increase the expression of BDNF. To validate this, we first measured the  
131 concentrations of MGO in PC12 cells after silencing or inhibiting GLO1 and found a significant increase in  
132 MGO concentrations when compared to the control (**Supplementary Figs. S3A and S3B**). In contrast,  
133 when GLO1 was overexpressed, the intracellular MGO levels were significantly decreased in the  
134 transfected cells (**Supplementary Fig. S3C**). These results confirm that the concentrations of MGO are  
135 inversely proportional to GLO1 enzymatic activity (24).

136 We further investigated whether MGO regulates the phosphorylation levels of TrkB and its

137 downstream effectors. As expected, incubation of MGO with PC12 cells for 1 h produced a concentration-  
138 dependent activation of the TrkB signaling pathway (**Supplementary Fig. S3F**). Consistently, MGO also  
139 increased the expression of BDNF mRNA in a dose-dependent manner (**Supplementary Fig. S3D**).  
140 Furthermore, incubation of MGO at 250  $\mu$ M for 15 or 30 min both robustly increased the levels of p-TrkB,  
141 p-Akt, p-ERK1/2 and p-CREB (**Supplementary Fig. S3G**), which demonstrates that MGO provokes the  
142 activation of BDNF/TrkB signaling in a fast way. Importantly, the nuclear entry of p-CREB was also  
143 significantly promoted by 250  $\mu$ M MGO (**Supplementary Fig. S4D**) and the mRNA levels of BDNF robustly  
144 increased at 3 h, peaked at 12 h and was detectable until 24 h, which is consistent to its changes at the  
145 protein level (**Supplementary Fig. S3E and S4A**). Besides, the phosphorylation of TrkB and the  
146 downstream p-ERK1/2 and p-CREB stimulated by 250  $\mu$ M MGO can last up to 12 h (**Supplementary Fig.**  
147 **S4A**). This long-lasting BDNF/TrkB signaling induced by MGO may enhance the synaptic transmission in  
148 adult hippocampus, and thus lead to antidepressant-like effects (25, 26).

149 Next, we explored the molecular mechanisms underlying this fast and sustained activation effect of  
150 MGO on BDNF/TrkB signaling. Firstly, to exclude the activation effects due to the accumulation of BDNF,  
151 we added the BDNF antibody to the cell cultures and found that it only partly abrogated MGO-induced  
152 phosphorylation of Akt, ERK1/2 and CREB in the first 9 h (**Fig. 2A** and **Supplementary Fig. S4B**). This  
153 result suggests that the apparent signaling activation effect caused by MGO does not completely attribute  
154 to BDNF. Further, we utilized K252a, a potent selective inhibitor for Trk receptors (27), to investigate  
155 whether MGO's effect is associated with the kinase activity of TrkB. As shown in Fig. 2e, K252a potently  
156 inhibited the phosphorylation of TrkB, Akt and ERK1/2 that was stimulated by BDNF or 7,8-  
157 dihydroxyflavone (7,8-DHF), a known small molecule agonist of TrkB (28). And the levels of p-TrkB, p-Akt  
158 and p-ERK1/2 induced by 250  $\mu$ M exogenous MGO or 10  $\mu$ M BBGC were also significantly decreased by  
159 this inhibitor (**Fig. 2B** and **Supplementary Fig. S4C**). Additionally, K252a also decreased the p-CREB  
160 levels and its nuclear entry induced by MGO (**Figs. 2B, 2C** and **Supplementary Fig. S4D**). All these  
161 demonstrate that the biological function of MGO is closely associated with the kinase activity of TrkB.

162 Further, the pull-down assays showed that treatment of 250  $\mu$ M MGO or 100 ng/mL BDNF significantly  
163 provoked the homodimerization and autophosphorylation of TrkB (**Fig. 2D**), which indicates that MGO  
164 physiologically mimics the functions of BDNF. The biolayer interferometry (BLI) assay showed that MGO  
165 directly binds to the extracellular domain (ECD, 32-429aa) of TrkB with a dissociation constant ( $K_d$ ) of 5.31  
166  $\mu$ M (**Fig. 2E**). However, MGO does not interact with the intracellular domain (ICD, 454-821aa) of TrkB  
167 (**Supplementary Fig. S4E**). This finding is important because in this way MGO generated in cytoplasm  
168 can rapidly diffuse across the cell membrane to enter into the extracellular space to bind to TrkB (18),  
169 avoiding potential intracellular off-target effects. Taken in sum, MGO selectively binds to the ECD of TrkB  
170 and functions as its agonist, and thus induces a fast and sustained activation of BDNF/TrkB signaling.

171

172 **MGO promotes the hippocampal neurogenesis and presents antidepressant effects on depression**  
173 **rats.**

174 Increasing BDNF expression is essential for the antidepressant action of both conventional  
175 antidepressants and the fast-acting agents, like ketamine (29, 30). Since MGO exhibits the capability of



176 enhancing the expression of BDNF *in vitro*, we further investigated whether MGO also exerts this effect *in*  
177 *vivo* which then leads to antidepressant activity (**Supplementary Fig. S5A**). We found that the treatment  
178 of low-dose MGO (5 mM/kg per day) for 3 weeks significantly reduced the immobility time of CUMS rats  
179 in the forced swim test (FST) (**Fig. 3A**) and robustly increased their time in the open arms in the elevated  
180 plus-maze (EPM) (**Fig. 3B** and **Supplementary Fig. S5B**). Consistently, the protein levels of GLO1 were  
181 significantly up-regulated in both HC and PFC areas of CUMS rats when compared with controls, whereas  
182 low-dose MGO treatment slightly decreased its expression levels but not significantly (**Fig. 3D** and  
183 **Supplementary Fig. S6A**). Besides, an acute high dose treatment of MGO (50 mM/kg per day, ip) for 3  
184 days also exhibited desirable antidepressant effects (**Supplementary Fig. S5C**). These suggest that MGO  
185 produces both sustained and fast-acting antidepressant effects on CUMS rats.

186 Next, we analyzed the levels of neurotransmitters in HC and PFC of rats, as the reduction of  
187 neurotransmitters in brain is a major contributing factor to depression (31). LC-MS/MS analysis showed  
188 that the concentrations of 5-HT, DA, 5-HIAA, DOPAC and HVA were significantly decreased in HC and  
189 PFC of CUMS rats (**Fig. 3C** and **Supplementary Fig. S6B**). But ip injection of low-dose MGO greatly  
190 increased the levels of these neurotransmitters in the brain of CUMS rats (**Fig. 3C** and **Supplementary**  
191 **Fig. S6B**), implying that the augmentation of the neurotransmitters is necessary for the antidepressant  
192 function of MGO.

193 We further examined whether in the brains of CUMS rats MGO activates the BDNF/TrkB signaling  
194 pathway. It is observed that the concentrations of MGO in both HC and PFC areas, as well as the plasma  
195 of CUMS rats were significantly decreased, whereas low-dose treatment of MGO for 3 weeks recovered  
196 MGO levels back to normal concentrations (**Fig. 3E** and **Supplementary Fig. S6C**). Coinciding with this,  
197 low-dose MGO treatment significantly provoked the phosphorylation of TrkB and increased the levels of p-  
198 Akt, p-ERK1/2 and p-CREB in both HC and PFC areas of CUMS rats (**Fig. 3F** and **Supplementary Fig.**  
199 **S6D**). And this led to a significantly increased expression and release of BDNF in both of these brain areas  
200 (**Fig. 3F** and **Supplementary Fig. S6D**). More importantly, we also found that after a single acute  
201 treatment of MGO (100 mM/kg) to CUMS rats, the TrkB signaling pathway in HC maintained a persistent  
202 activation state in 9 h (**Supplementary Fig. S6E**), which is consistent with MGO's long-lasting effects on  
203 BDNF/TrkB signaling in PC12 cells (**Fig. 2C**). All these demonstrate that MGO triggers the activation of  
204 BDNF/TrkB signaling in both HC and PFC areas of CUMS rats.

205 Further, to explore the biological effects of MGO-stimulated BDNF/TrkB signaling on CUMS rats, we  
206 conducted an RNA sequencing analysis on the HC and PFC areas of CUMS rats treated with either vehicle  
207 or 100 mM/kg MGO. Pathway enrichment analysis of the differentially expressed genes (DEGs) in PFC  
208 identified the 'neurotrophin signaling pathway' as the top-ranked KEGG pathway (**Supplementary Tables**  
209 **S4, S5** and **Supplementary Fig. S6G**). Functional enrichment analysis of these DEGs showed that they  
210 mainly participated in the proliferation and differentiation of neurons (**Fig. 3G**), which is responsible for  
211 maintaining the neuron development and neurogenesis in the adult brain (32). Consistently, qRT-PCR  
212 analysis further validated that MGO significantly up-regulated the mRNA expression levels of Cnot7, Ptgs2  
213 and Rela that are involved in the positive regulation of cell proliferation, and down-regulated Cav2, Btg1  
214 and Tob1 that are responsible for the negative regulation of cell proliferation (**Fig. 3H** and **Supplementary**  
215 **Table S5**). In addition, MGO also increased the mRNA expression levels of Bdnf, Rps6ka2 and Abl1, which

216 are important genes in the BDNF/TrkB signaling (**Fig. 3H** and **Supplementary Table S5**). These findings  
217 indicate that the activation of BDNF/TrkB signaling by MGO results in mainly a positive regulation of the  
218 neuron proliferation.

219 Accumulating evidence has suggested that altered neurogenesis in adult hippocampus mediates the  
220 action of antidepressants (33). Thus, we further examined whether MGO is able to modulate hippocampal  
221 neurogenesis. It is observed that the density of both BrdU+ new born neurons and BrdU+/NeuN+ neurons  
222 was decreased in the hippocampal dentate gyrus (DG) of CUMS rats (**Fig. 3I**). Whereas low-dose MGO  
223 treatment significantly increased the proportion of these cells (**Fig. 3I**), indicating that MGO is capable of  
224 promoting hippocampal neurogenesis in CUMS rats. Together, all these demonstrate that MGO effectively  
225 promotes the hippocampal neurogenesis by activating the BDNF/TrkB signaling pathway, and thus  
226 presents antidepressant effects in CUMS rats.

227

### 228 **Luteolin exerts antidepressant effects by targeting GLO1.**

229 The desirable antidepressant effects of MGO makes GLO1 a potential therapeutic target for  
230 depression. Firstly, to demonstrate the association between GLO1 and depression-like behaviors in rats,  
231 we utilized the adeno-associated viral (AAV) vector-mediated overexpression of GLO1 in the HC of rats.  
232 The results showed that OE-GLO1 rats exhibited a reduction of MGO concentrations in brain tissues, and  
233 a significantly increased immobility time in FST and decreased entries into open arms in EPM  
234 (**Supplementary Figs. S7A, B and C**), which is consistent with the effects exhibited in transgenic GLO1  
235 overexpression mice (19). Then, by application of two in house systems pharmacology-based drug  
236 targeting tools, i.e., WES (34) and TCMS (35), a flavone molecule, luteolin, was screened out as a  
237 candidate compound that may target GLO1 (**Fig. 4A**). The fluorescence spectroscopy experiment showed  
238 a  $K_d$  value of 47.17  $\mu$ M for luteolin binding to GLO1 (**Fig. 4B**). Additionally, the *in vivo* cellular thermal shift  
239 assay (CETSA) (36) also validates their binding in intact cells (**Fig. 4C**) with the  $EC_{50}$  concentration of  
240 45.23  $\mu$ M for luteolin at which half-maximal thermal stabilization of GLO1 in PC12 cells was observed  
241 (**Supplementary Fig. S7E**).

242 Next, to explore the binding mode of luteolin with GLO1, we performed molecular docking coupled  
243 with molecular dynamic (MD) simulations. Three residues, E99, Q33 and F62 were identified as crucial  
244 residues for the binding, as that in GLO1 active pocket they formed hydrogen bonds and an edge-to-face  
245 aromatic interaction with luteolin (**Fig. 4D**). Then the drug affinity responsive target stability (DARTS)  
246 analysis (37) was performed with the purified GLO1 wild type or mutants (E99A, F62A and Q33E)  
247 incubated with luteolin. Resultantly, consistent with the *in silico* predictions, all mutants exhibited reduced  
248 binding affinities of luteolin to GLO1 in different extent (**Fig. 4E**), confirming the importance of these  
249 residues in the binding pocket. Regarding luteolin, its carbonyl, resorcinol and pyrocatechol substituents  
250 form H-bonds and hydrophobic-interactions with GLO1, demonstrating the key roles of these groups in  
251 luteolin's binding within the active site of GLO1 (**Fig. 4D**). More importantly, we found that the hydroxyl  
252 group of the resorcinol is freely buried into the positively charged mouth, a big hydrophobic tunnel  
253 constituted by residues F62, F67, L69 and T101 (**Fig. 4D** and **Supplementary Fig. S7F**). To further  
254 investigate whether this hydrophobic cavity is beneficial for the binding, we modified the hydroxyl group of

255 the resorcinol into a bulkier group, i.e., 1, 2-dimethoxyethane, and obtained a new derivative, named as  
256 lutD (**Fig. 4A** and **Supplementary Fig. S8**). Intriguingly, fluorescence spectroscopy analysis presents a  
257 1.5-fold increase of the association constant ( $K_a$ ) (from  $2.12 \times 10^4 \text{ L}\cdot\text{mol}^{-1}$  to  $3.22 \times 10^4 \text{ L}\cdot\text{mol}^{-1}$ ) for lutD  
258 compared with luteolin (**Supplementary Figs. S7D**), indicating that the bulky groups in resorcinol  
259 contribute to a more potent GLO1 binding. Actually, MD simulations on lutD and GLO1 shows that this  
260 mouth zone is empty and thus provides sufficient space for bulky substituents (**Supplementary Figs. S7F**  
261 **and G**). Besides, the hydrophobic interaction between the methoxyethane group of lutD and F67, L160  
262 (**Supplementary Fig. S7G**) also strengthens the interactions between lutD and GLO1. All these results  
263 demonstrate that luteolin is a potent binder of GLO1, in which H-bonds and hydrophobic interactions are  
264 important for the binding.

265 We next evaluated whether luteolin exhibits antidepressant effects on CUMS rats. The results show  
266 that ip administration of 10 mg/kg luteolin per day for 3 weeks markedly reduced the immobility time of rats  
267 in FST and increased their number of entries in the open arms in EPM (**Figs. 4F, 4G**, and **Supplementary**  
268 **Fig. S9A**). Whereas no significant effects were observed for luteolin in GLO1 overexpression rats. We also  
269 found that chronic luteolin treatment increased the plasma MGO levels and the concentrations of  
270 neurotransmitters in HC and PFC areas of rats (**Figs. 4H** and **Supplementary Fig. S9B and C**). These  
271 results demonstrate that luteolin exerts antidepressant effects on CUMS rats by targeting GLO1. Besides,  
272 similar to MGO, luteolin treatment also promoted hippocampal neurogenesis as indicated by obviously  
273 increased number of BrdU+ or BrdU+/NeuN+ cells in the hippocampal DG of CUMS rats (**Supplementary**  
274 **Fig. S9D**). Additionally, single dose treatment of 20 mg/kg luteolin potently activated the BDNF/TrkB  
275 signaling in a time-dependent manner in the HC of CUMS rats (**Fig. 4I**). All these data reveal that through  
276 targeting GLO1, luteolin increases MGO concentrations in CUMS rats and subsequently triggers the  
277 BDNF/TrkB signaling pathway, resulting in desirable antidepressant effects.

278

## 279 Discussion

280 The present study demonstrates a novel, fast-acting MGO/TrkB axis and highlights the potential of  
281 GLO1 as a depression target (**Fig. 5**). And based on this, luteolin, as a novel GLO1 inhibitor, was  
282 discovered and its binding affinity as well as the interaction features with GLO1 were deeply explored. As  
283 a natural flavonoid, luteolin exists in many plants with antioxidant, memory-improving, and anxiolytic  
284 activities (38). Importantly, the ip lethal doses ( $LD_{50}$ ) of luteolin in rats is 411 mg/kg (39), implying that it  
285 has little or no toxicity when administrated at low-dose (10 mg/kg). Therefore, this work not only presents  
286 a novel strategy for the treatment of MDD and but also identifies a natural product luteolin as a promising  
287 antidepressant.

288 One of our key findings is that MGO functions as an endogenous agonist of TrkB. We demonstrate that  
289 MGO directly and selectively binds to the extracellular domain of TrkB and stimulates its dimerization and  
290 autophosphorylation. And in this way, it triggers a rapid and sustained activation of TrkB-mediated  
291 Akt/CREB signaling, which rapidly increases the expression of BDNF, thus being beneficial to MDD.  
292 Clinically, increasing the BDNF level in brain is of particular therapeutic interests for depression (30, 40).  
293 However, current clinical trials using recombinant BDNF in patients always turn out disappointing due to



294 series of reasons like poor delivery, short half-life, and potential side effects (41). Our finding that MGO at  
295 normal concentrations acts as a switch on activating the BDNF-feedback loop provides a new feasible way  
296 to increase the BDNF levels for MDD patients. Besides, the chronic administration of MGO does not cause  
297 any weight gains in rats (data not shown), avoiding the major side effects produced by current clinically-  
298 used tricyclic antidepressants and monoamine oxidase inhibitors (42, 43). Thus, manipulating endogenous  
299 MGO concentrations in brain provides a novel alternative way for treating MDD with more favorable  
300 tolerability and efficacy.

301 Although several studies have suggested the potential role of GLO1 in human psychiatric disorders  
302 and its associations with depression-like behaviors (44-46), the direct evidence of the correlations between  
303 GLO1 and behavior phenotype is still lacking. The present study offers compelling evidence that GLO1 is  
304 responsible for the depression-like behaviors in CUMS rats. Importantly, we have carefully explored the  
305 druggability of GLO1. Molecular docking and MD simulations identified three residues E99, F62 and Q33  
306 of GLO1 as key components in stabilizing the drug binding conformation, and *in vitro* mutation studies  
307 further validate the crucial roles of these amino acids. Specifically, comparing the binding pockets of  
308 luteolin and lutD to GLO1 suggests that introduction of a bulkier and negatively ionizable group at the  
309 resorcinol of luteolin can increase its hydrophobic interactions with GLO1, which produces a functionally  
310 closed gate in the protein, and strengthens the drug-target interactions. Overall, these findings highlight  
311 the possibility of GLO1 as a potential depression therapeutic target and provide important clues on how to  
312 design new antidepressants.

313

## 314 **Materials and methods**

315 **Drugs.** The following drugs were used in this study, including methylglyoxal solution (Sigma-Aldrich,  
316 M0252), S-p-bromobenzylglutathione cyclopentyl diester (Sigma-Aldrich, cat. no. SML1306), K252a  
317 (Abcam, cat. no. ab120419), luteolin (TCI chemicals, TT2682), 7,8-dihydroxyflavone (7,8-DHF) (Abcam,  
318 cat. no. ab120996), and recombinant human BDNF protein (R&D Systems, cat. no. 248-BD-025).

319

320 **Animals and drug treatments.** Adult Sprague-Dawley (SD) male rats (180 - 200 g) were group-housed  
321 with standard laboratory bedding and conditions (12-h light/dark cycle,  $22 \pm 1^\circ\text{C}$ , ad libitum access to food  
322 and water) for 1 week prior to the experiments. All rats were randomly assigned to three experimental  
323 groups, i.e., non-stress control + saline (SAL); stress (CUMS) + SAL; stress (CUMS) + drugs (5 mM/kg/day  
324 of MGO or 10 mg/kg/day of luteolin). To avoid the possible bias induced by the behavioral tests, the rats  
325 in each group were divided into two sets ( $n = 10$  per set). The first set provided tissue samples used for  
326 morphological analysis, western blotting and qRT-PCR analyses, while the second one was adopted for  
327 behavioral assessments. During the last 3 weeks of the CUMS protocol, rats were injected ip daily with  
328 drugs. The experimental procedures performed in this study were in line with the Guidelines of NIH for the  
329 Use of Laboratory Animals as well as approved by the Northwest University Animal Care and Use  
330 Committees.

331

332 **CUMS.** To induce the physical, behavioral, biochemical, and physiological phenotypes of depression, all  
333 rats were subjected to a schedule of mild psychosocial stressors for 8 weeks (**Supplementary Fig. S5A**).  
334 The stressors included alterations of the bedding (sawdust change, removal or damp of sawdust,  
335 substitution of sawdust with 21°C water, rat, or cat feces), cage-tilting (45°) or shaking (2 × 30 s), cage  
336 exchange (rats were positioned in the empty cage of another male), predator sounds (for 15 min), and  
337 alterations of the length and time of light/dark cycle. Physical changes were assessed weekly by measuring  
338 the body weight of the animal. Additionally, in order to evaluate the neurogenesis by immunocytochemistry,  
339 rats were ip injected with BrdU (2 × 150 mg/kg) at the day before treatments.

340

341 **Behavioral assessment.** At the end of the CUMS protocol, the behavioral tests EPM and FST were  
342 conducted. Two days were given for rats between exposures to different behavioral assessments and all  
343 behavioral testing experiments were carried out during the daily light phase (09:00 am – 05:00 pm).

344 **Elevated plus-maze test** Rats were placed in the center of a standard EPM apparatus (two open and two  
345 closed 33 cm × 5 cm arms) for examining the anxiety-like behaviors of rats. The exploratory activity was  
346 measured over a 5-min period. Then, the percentage of time spent in the open arms, an index of anxiety-  
347 like behavior, the number of entries in the closed arms, an indicator of locomotion, were determined.

348 **Forced swim test** In brief, SD rats were placed in a glass cylinder filled with water (23°C; 30 cm deep)  
349 and a 5-min swim test session was video-recorded. Employing an automated video tracking system, the  
350 time spent immobile during the last 4 minutes of the test and the latency to immobility were scored. An  
351 increase in immobility time indicates a higher degree of depressive state. All tests were analyzed by  
352 TopScan (CleverSys, Inc., CSI) system.

353

354 **Quantification of MGO levels.** Following the manufacturers's instructions, analysis of the levels of MGO  
355 in the plasma (Hycult Biotech, HIT503) and cell lysis (Cell Biolabs, STA-811) was carried out using specific  
356 enzyme-linked immunosorbent assays. Plasma was collected from aortavertralis and separated into  
357 Eppendorf tubes that contained EDTA to inhibit coagulation effect. The mixed blood and EDTA were then  
358 inverted and placed on ice for 20 min. After the inversion, the mixture blood sample was centrifuged for  
359 15 min at 1500×g at 4°C. The supernatant was then collected and transferred to a fresh polypropylene  
360 tube for analysis. To detect MGO-adducts in cell lysate, 50 µg of total protein from fresh tissues or cell  
361 cultures were prepared using a Qproteome Mammalian Protein Prep Kit (Qiagen, Germany) in accordance  
362 with the manufacturer's protocol.

363

364 **Biolayer interferometry.** The kinetics of MGO binding to the extracellular or cytoplasmic domain of  
365 recombinant human TrkB protein was assessed using biolayer interferometry with an Octet K2 system  
366 (ForteBio). All of the experiments were performed at 30°C under buffer conditions of PBST (0.1% Tween  
367 20), pH 7.4, 8% DMSO. NI-NTA biosensors (FortéBio Inc., Menlo Park, CA) were used to capture TrkB  
368 proteins onto the surface of the sensor. After reaching baseline, sensors were moved to association step

369 for 60 s and then dissociated for 60 s. Curves were corrected by a double-referencing technique, using  
370 both NI-NTA pins dipped into the experimental wells and a buffer-only reference. After double referencing  
371 corrections, the subtracted binding interference data were applied to the calculations of binding constants  
372 using the FORTEBIO analysis software (Version: 9.0.0.10) provided with the instrument.

373

374 **Statistical analyses.** All data given in text and figures indicate mean  $\pm$  s.e.m. For analysis of experiments  
375 with two groups, we used the parametric unpaired two-tailed Student's t test. For analysis of experiments  
376 with three or more groups, the parametric one-way ANOVA with Post hoc Dunnett's multiple comparisons  
377 test or two-way ANOVA with Post hoc Sidak's multiple comparisons test were used. Differences were  
378 considered significant when P was  $< 0.05$ . NS = not significant, \* P  $< 0.05$ , \*\* P  $< 0.01$ , \*\*\* P  $< 0.001$ .

379

380 Additional materials and methods are provided in the SI Materials and Methods.

381

382 **Acknowledgements**

383 We thank Z. Jun for technical assistances and reagents. The research is financially supported by the  
384 National Natural Science Foundation of China (NO. U1603285)

385

386 **Conflict of interest**

387 The authors declare that they have no conflict of interest.

388

389 **Supplementary information** is available at the publisher's website.

390

## 391 References

- 392 1. Zanos P, *et al.* (2016) NMDAR inhibition-independent antidepressant actions of ketamine metabolites.  
393 *Nature* 533(7604):481-486.
- 394 2. Duman RS, Aghajanian GK, Sanacora G, & Krystal JH (2016) Synaptic plasticity and depression: new insights  
395 from stress and rapid-acting antidepressants. *Nat Med* 22(3):238-249.
- 396 3. Egeland M, Zunszain PA, & Pariante CM (2015) Molecular mechanisms in the regulation of adult  
397 neurogenesis during stress. *Nat Rev Neurosci* 16(4):189-200.
- 398 4. Longo FM & Massa SM (2013) Small-molecule modulation of neurotrophin receptors: a strategy for the  
399 treatment of neurological disease. *Nat Rev Drug Discov* 12(7):507-525.
- 400 5. Tuvikene J, Pruunsild P, Orav E, Esvald EE, & Timmusk T (2016) AP-1 Transcription Factors Mediate BDNF-  
401 Positive Feedback Loop in Cortical Neurons. *J Neurosci* 36(4):1290-1305.
- 402 6. Nagahara AH & Tuszynski MH (2011) Potential therapeutic uses of BDNF in neurological and psychiatric  
403 disorders. *Nat Rev Drug Discov* 10(3):209-219.
- 404 7. Castren E & Antila H (2017) Neuronal plasticity and neurotrophic factors in drug responses. *Mol Psychiatry*  
405 22(8):1085-1095.
- 406 8. Bus BA, *et al.* (2015) Chronic depression is associated with a pronounced decrease in serum brain-derived  
407 neurotrophic factor over time. *Mol Psychiatry* 20(5):602-608.
- 408 9. Harward SC, *et al.* (2016) Autocrine BDNF-TrkB signalling within a single dendritic spine. *Nature*  
409 538(7623):99-103.
- 410 10. Allaman I, Belanger M, & Magistretti PJ (2015) Methylglyoxal, the dark side of glycolysis. *Front Neurosci*  
411 9:23.
- 412 11. Shamsi FA, Partal A, Sady C, Glomb MA, & Nagaraj RH (1998) Immunological evidence for methylglyoxal-  
413 derived modifications in vivo. Determination of antigenic epitopes. *J Biol Chem* 273(12):6928-6936.
- 414 12. Yao D, *et al.* (2007) High glucose increases angiopoietin-2 transcription in microvascular endothelial cells  
415 through methylglyoxal modification of mSin3A. *J Biol Chem* 282(42):31038-31045.
- 416 13. Di Loreto S, *et al.* (2004) Methylglyoxal induces oxidative stress-dependent cell injury and up-regulation  
417 of interleukin-1beta and nerve growth factor in cultured hippocampal neuronal cells. *Brain Res*  
418 1006(2):157-167.
- 419 14. Bierhaus A, *et al.* (2012) Methylglyoxal modification of Nav1.8 facilitates nociceptive neuron firing and  
420 causes hyperalgesia in diabetic neuropathy. *Nat Med* 18(6):926-933.
- 421 15. Ramasamy R, Yan SF, & Schmidt AM (2006) Methylglyoxal comes of AGE. *Cell* 124(2):258-260.
- 422 16. Angeloni C, *et al.* (2015) Neuroprotective effect of sulforaphane against methylglyoxal cytotoxicity. *Chem*  
423 *Res Toxicol* 28(6):1234-1245.
- 424 17. Belanger M, *et al.* (2011) Role of the glyoxalase system in astrocyte-mediated neuroprotection. *J Neurosci*  
425 31(50):18338-18352.
- 426 18. Distler MG, *et al.* (2012) Glyoxalase 1 increases anxiety by reducing GABA<sub>A</sub> receptor agonist methylglyoxal.  
427 *J Clin Invest* 122(6):2306-2315.
- 428 19. McMurray KMJ, *et al.* (2018) Identification of a novel, fast-acting GABAergic antidepressant. *Mol Psychiatry*  
429 23(2):384-391.
- 430 20. Li JZ, *et al.* (2013) Circadian patterns of gene expression in the human brain and disruption in major  
431 depressive disorder. *Proc Natl Acad Sci U S A* 110(24):9950-9955.
- 432 21. Liu BH, *et al.* (2010) DCGL: an R package for identifying differentially coexpressed genes and links from  
433 gene expression microarray data. *Bioinformatics* 26(20):2637-2638.
- 434 22. Bramham CR & Messaoudi E (2005) BDNF function in adult synaptic plasticity: the synaptic consolidation



- 435 hypothesis. *Prog Neurobiol* 76(2):99-125.
- 436 23. Atwal JK, Massie B, Miller FD, & Kaplan DR (2000) The TrkB-Shc site signals neuronal survival and local  
437 axon growth via MEK and P13-kinase. *Neuron* 27(2):265-277.
- 438 24. Thornalley PJ (1996) Pharmacology of methylglyoxal: formation, modification of proteins and nucleic acids,  
439 and enzymatic detoxification--a role in pathogenesis and antiproliferative chemotherapy. *Gen Pharmacol*  
440 27(4):565-573.
- 441 25. Kang H & Schuman EM (1995) Long-lasting neurotrophin-induced enhancement of synaptic transmission  
442 in the adult hippocampus. *Science* 267(5204):1658-1662.
- 443 26. Hoshaw BA, Malberg JE, & Lucki I (2005) Central administration of IGF-I and BDNF leads to long-lasting  
444 antidepressant-like effects. *Brain Res* 1037(1-2):204-208.
- 445 27. Tapley P, Lamballe F, & Barbacid M (1992) K252a is a selective inhibitor of the tyrosine protein kinase  
446 activity of the trk family of oncogenes and neurotrophin receptors. *Oncogene* 7(2):371-381.
- 447 28. Jang SW, *et al.* (2010) A selective TrkB agonist with potent neurotrophic activities by 7,8-dihydroxyflavone.  
448 *Proc Natl Acad Sci U S A* 107(6):2687-2692.
- 449 29. Bjorkholm C & Monteggia LM (2016) BDNF - a key transducer of antidepressant effects.  
450 *Neuropharmacology* 102:72-79.
- 451 30. Kato T, *et al.* (2017) BDNF release and signaling are required for the antidepressant actions of GLYX-13.  
452 *Mol Psychiatry*.
- 453 31. Duman RS & Aghajanian GK (2012) Synaptic dysfunction in depression: potential therapeutic targets.  
454 *Science* 338(6103):68-72.
- 455 32. Jones KR, Farinas I, Backus C, & Reichardt LF (1994) Targeted disruption of the BDNF gene perturbs brain  
456 and sensory neuron development but not motor neuron development. *Cell* 76(6):989-999.
- 457 33. Oh YS, *et al.* (2013) SMARCA3, a chromatin-remodeling factor, is required for p11-dependent  
458 antidepressant action. *Cell* 152(4):831-843.
- 459 34. Zheng C, *et al.* (2015) Large-scale Direct Targeting for Drug Repositioning and Discovery. *Sci Rep* 5:11970.
- 460 35. Ru J, *et al.* (2014) TCMSP: a database of systems pharmacology for drug discovery from herbal medicines.  
461 *J Cheminform* 6:13.
- 462 36. Jafari R, *et al.* (2014) The cellular thermal shift assay for evaluating drug target interactions in cells. *Nat*  
463 *Protoc* 9(9):2100-2122.
- 464 37. Lomenick B, *et al.* (2009) Target identification using drug affinity responsive target stability (DARTS). *Proc*  
465 *Natl Acad Sci U S A* 106(51):21984-21989.
- 466 38. Ishisaka M, *et al.* (2011) Luteolin shows an antidepressant-like effect via suppressing endoplasmic reticulum  
467 stress. *Biol Pharm Bull* 34(9):1481-1486.
- 468 39. Seelinger G, Merfort I, & Schempp CM (2008) Anti-oxidant, anti-inflammatory and anti-allergic activities  
469 of luteolin. *Planta Med* 74(14):1667-1677.
- 470 40. Ma Z, *et al.* (2017) TrkB dependent adult hippocampal progenitor differentiation mediates sustained  
471 ketamine antidepressant response. *Nat Commun* 8(1):1668.
- 472 41. Colle R, *et al.* (2015) BDNF/TRKB/P75NTR polymorphisms and their consequences on antidepressant  
473 efficacy in depressed patients. *Pharmacogenomics* 16(9):997-1013.
- 474 42. Fava M (2000) Weight gain and antidepressants. *J Clin Psychiatry* 61 Suppl 11:37-41.
- 475 43. Kent JM (2000) SNRIs, NaSSAs, and NaRIs: new agents for the treatment of depression. *Lancet*  
476 355(9207):911-918.
- 477 44. Benton CS, *et al.* (2012) Evaluating genetic markers and neurobiochemical analytes for fluoxetine response  
478 using a panel of mouse inbred strains. *Psychopharmacology (Berl)* 221(2):297-315.

- 479 45. Yang Y, *et al.* (2013) Proteomics reveals energy and glutathione metabolic dysregulation in the prefrontal  
480 cortex of a rat model of depression. *Neuroscience* 247:191-200.
- 481 46. Patki G, Solanki N, Atrooz F, Allam F, & Salim S (2013) Depression, anxiety-like behavior and memory  
482 impairment are associated with increased oxidative stress and inflammation in a rat model of social stress.  
483 *Brain Res* 1539:73-86.
- 484

## 485 **Figure legends**

486 **Figure 1. GLO1 negatively regulates the BDNF/TrkB signaling pathway.** (A) GSEA analysis between GLO1  
487 coexpression gene signatures and the BDNF/TrkB signaling pathway in HC and DLPFC areas of depression patients. HC,  
488 hippocampus; DLPFC, dorsolateral prefrontal cortex. (B and C) Immunoblot analysis of protein expressions of (B) GLO1  
489 and (C) BDNF (percentage of protein to GAPDH) in PC12 cells after shRNA-mediated GLO1 knockdown (shA and shB)  
490 compared to shCont. Representative western blots are shown on top of the quantitative plots. shCont, a non-targeting control  
491 shRNA; shA and shB are the shRNAs targeting GLO1. (D) Measurement of mRNA expression levels of GLO1 and BDNF  
492 by qRT-PCR in PC12 cells after shRNA-mediated GLO1 knockdown compared to shCont. Data are presented as mean  $\pm$   
493 s.e.m., n = 3 samples collected independently. \*P < 0.05, \*\*P < 0.01, \*\*\*P < 0.001; one-way ANOVA with Dunnett's multiple  
494 comparisons test. (E) Immunoblot analysis and quantification of protein expression, which highlights the increase of p-TrkB,  
495 p-Akt, p-ERK1/2 and p-CREB (percentage of phosphorylated protein to total protein) after shRNA-mediated GLO1  
496 knockdown. Data in B, C, E are presented as mean percentage  $\pm$  s.e.m. of the mean values of the control group; n = 3  
497 samples collected independently. \*P < 0.05, \*\*P < 0.01, \*\*\*P < 0.001; one-way ANOVA with Dunnett's multiple comparisons  
498 test. (F and G) Immunoblot analysis and quantification of protein expression, which highlight the increase of GLO1 (F) and  
499 decrease of BDNF (G) protein levels (percentage of protein to GAPDH) after pHBLV-CMV-MCS-3flag-EF1 vector-mediated  
500 GLO1 overexpression. Representative western blots are shown on top of the quantitative plots. (H) Immunoblot analysis  
501 and quantification of protein expression, which shows the reduction of p-TrkB, p-Akt, p-ERK1/2 and p-CREB (percentage of  
502 phosphorylated protein to total protein) after lentiviral (LV) vector-mediated overexpression of GLO1 (OE-GLO1) compared  
503 with control vector (OE-Cont). Data in F, G, H are presented as mean percentage  $\pm$  s.e.m. of the mean values of the control  
504 group, n = 3 samples collected independently. \*P < 0.05, \*\*P < 0.01; two-tailed paired t-test.

505

506 **Figure 2. MGO induces a fast and sustained BDNF/TrkB signaling by binding to TrkB.** (A) Either 250  $\mu$ M MGO or  
507 additional 20 ng/mL anti-BDNF were preincubated for various periods of time with cultured PC12 cells. Representative  
508 western blots of p-CREB (S133) and CREB are shown in the left. The quantification of ratios of immunoreactivity of p-CREB  
509 (S133) to CREB is shown in the right. Data are presented as mean percentage  $\pm$  s.e.m. of the mean values of the control  
510 group; n = 3 samples collected independently. \*P < 0.05, \*\*P < 0.01, \*\*\*P < 0.001, NS = not significant; two-way ANOVA  
511 with Sidak's multiple comparisons test between MGO+Anti-BDNF group and MGO group. (B) Preincubating PC12 cells with  
512 10  $\mu$ M 7,8-DHF, 100 ng/mL BDNF, 250  $\mu$ M MGO or 10  $\mu$ M BBGC for 1 h significantly activated the TrkB signaling compared  
513 to that with 1% DMSO. While addition of 100 nM K252a markedly reduced the activation effects (n = 3). (C)  
514 Immunocytochemistry (ICC) assay depicting the total CREB (green) and the phosphorylation levels of CREB (red) in PC12  
515 cells. Treatment with 250  $\mu$ M MGO for 1 h induced the phosphorylation of CREB, while preincubating the PC12 cells with  
516 K252a for 30 min blocked this effect. DAPI (blue) was employed to stain the nuclei. (D) Flag-tagged and His-tagged TrkB  
517 were co-transfected into HEK-293 cells. The cells were then treated with either PBS, 250  $\mu$ M MGO or 100 ng/mL BDNF for  
518 30 min. Subsequently, Flag-tagged TrkB was pulled down and monitored by 6 $\times$ His-tagged antibody. (E) Biolayer  
519 interferometry (BLI) data depicting the association and dissociation sensograms at different concentrations of MGO for the  
520 interaction analysis of MGO with the extracellular domain (ECD) of TrkB.

521

522 **Figure 3. The antidepressant effects of MGO on CUMS rats.** (A) Comparison of immobility time in the forced swim test  
523 (FST) of normal rats (control) and CUMS rats treated with either vehicle or MGO 5 mM/kg intraperitoneal (ip) per day for 3  
524 weeks. MGO treatment significantly decreased the immobility time compared to CUMS rats. (B) In the elevated plus-maze

525 (EPM) test, CUMS rats exhibited decreased number of entries to open arms, whereas treating with MGO 5 mM/kg ip per  
526 day for 3 weeks significant increased the entry times to open arms. Data in **A** and **B** are presented as mean  $\pm$  s.e.m., n =  
527 10 per group. \*P < 0.05, \*\*P < 0.01, \*\*\*P < 0.001; one-way ANOVA with Dunnett's multiple comparisons test. **(C)** LC-MS/MS  
528 analysis of the concentrations of monoamines and their metabolites in the HC homogenates in rats. 5-HT, serotonin; DA,  
529 dopamine; 5-HIAA, 5-hydroxyindoleacetic acid; DOPAC, 3,4-dihydroxyphenylacetic acid; HVA, homovanillic acid. Data are  
530 presented as mean  $\pm$  s.e.m., n = 5 per group. \*P < 0.05, \*\*P < 0.01, \*\*\*P < 0.001, NS = not significant; one-way ANOVA with  
531 Dunnett's multiple comparisons test. **(D)** Quantification of GLO1 protein levels (percentage of protein to GAPDH) in the HC  
532 and PFC of normal rats (control) and CUMS rats treated with either vehicle or MGO (5 mM/kg, ip) per day for 3 weeks. Data  
533 are presented as mean percentage  $\pm$  s.e.m. of the mean values of the control group, n = 4 per group. \*P < 0.05, NS = not  
534 significant; one-way ANOVA with Dunnett's multiple comparisons test. **(E)** MGO levels in the HC and PFC of normal rats  
535 (control) and CUMS rats treated with either vehicle or MGO (5 mM/kg, ip) per day for 3 weeks. MGO levels were measured  
536 by MGO-H1 protein adducts using ELISA assay. Data are presented as mean  $\pm$  s.e.m., n = 5 per group. \*P < 0.05, \*\*\*P <  
537 0.001; one-way ANOVA with Dunnett's multiple comparisons test. **(F)** Western blotting analysis of GLO1, BDNF and other  
538 proteins involved in TrkB signaling pathway of HC lysates of different groups of rats. Compared to CUMS rats, MGO-treated  
539 rats (5 mM/kg, ip per day for 3 weeks) exhibited increased p-TrkB, p-Akt, p-ERK1/2 and p-CREB immunoreactivity (n = 4).  
540 **(G)** Heatmap showing the differentially expressed genes (DEGs) and enriched GO terms in the PFC of different groups of  
541 rats. **(H)** qRT-PCR analysis of the genes in TrkB signaling or genes related to cell proliferation in the PFC lysates of different  
542 group of rats. Data are presented as mean  $\pm$  s.e.m., n = 5 per group. \*P < 0.05, \*\*P < 0.01, \*\*\*P < 0.001, NS = not significant;  
543 one-way ANOVA with Dunnett's multiple comparisons test. **(I)** Representative images of immunostaining of BrdU (red) and  
544 NeuN (green) in hippocampal dentate gyrus of rats, scale bar = 50  $\mu$ m (left). The numbers of BrdU+ and BrdU+/NeuN+ cells  
545 are shown in right. MGO treatment increased the density of both BrdU+ new born neurons and BrdU+/NeuN+ neurons in  
546 the hippocampal dentate gyrus of CUMS rats. Data are presented as mean  $\pm$  s.e.m., n = 5 per group. \*P < 0.05, \*\*P < 0.01;  
547 one-way ANOVA with Dunnett's multiple comparisons test.

548

549 **Figure 4. Luteolin shows antidepressant effects through targeting GLO1.** **(A)** Chemical structures of luteolin and its  
550 derivative lutD used in this study. **(B)** Fluorescence spectra analysis of GLO1 in the presence of various concentrations of  
551 luteolin. T = 298 K,  $\lambda_{ex}$  = 280 nm,  $C_{GLO1}$  = 5  $\mu$ M. **(C)** Representative western blot of CETSA (top) or CETSA melt curves  
552 (bottom) in cell lysate for GLO1 targeted by luteolin (at 100  $\mu$ M). Data are presented as mean  $\pm$  s.e.m., n = 3 samples  
553 collected independently. \*P < 0.05, \*\*\*P < 0.001; two-way ANOVA with Sidak's multiple comparisons test between luteolin  
554 treatment group and DMSO group. **(D)** Plot view of MD-simulated binding mode of GLO1 with luteolin. **(E)** Drug affinity  
555 responsive target stability (DARTS) analysis that shows interactions between luteolin and GLO1 wild type or mutant. **(F** and  
556 **G)** Luteolin (10 mg/kg) significantly increased the number of entries of rats in central and open zones during the FST test  
557 **(F)** and decreased immobility time in the EPM test **(G)** compared to vehicle treatment, indicating an antidepressant-like  
558 response. Data in **F** and **G** are presented as mean  $\pm$  s.e.m., n = 10 per group. \*P < 0.05, \*\*P < 0.01, \*\*\*P < 0.001, NS = not  
559 significant; one-way ANOVA with Dunnett's multiple comparisons test. **(H)** Plasma MGO levels of CUMS rats after treated  
560 with luteolin for 3, 12, 24 h. Data are presented as mean  $\pm$  s.e.m., n = 5 per group. \*\*P < 0.01, \*\*\*P < 0.001; one-way ANOVA  
561 with Dunnett's multiple comparisons test between CUMS+SAL group and other groups. **(I)** Time course of TrkB, Akt, ERK1/2  
562 and CREB and their phosphorylation levels as assessed by western blot in the HC of CUMS rats after single dose treatment  
563 with luteolin (20 mg/kg) (n = 3).

564

565 **Figure 5. The molecular mechanisms underlying the antidepressant effects of MGO.** Under normal conditions, MGO  
566 binds to the extracellular domain of TrkB and provokes its dimerization and autophosphorylation, which then activates the  
567 downstream Akt and ERK signaling, as well as the phosphorylation of the transcription factor CREB. This effectively induces  
568 the expression of BDNF and forms a BDNF-positive feedback loop, which further promotes the proliferation of neurons.  
569 Whereas under depressive state, the concentrations of MGO are significantly decreased partly due to the increased  
570 expression levels or enzyme activities of GLO1. This results in inactivation of the BDNF/TrkB signaling (left). GLO1 inhibitors,  
571 such as luteolin, effectively increase the concentrations of MGO and thus exert antidepressant effects (right).  
572



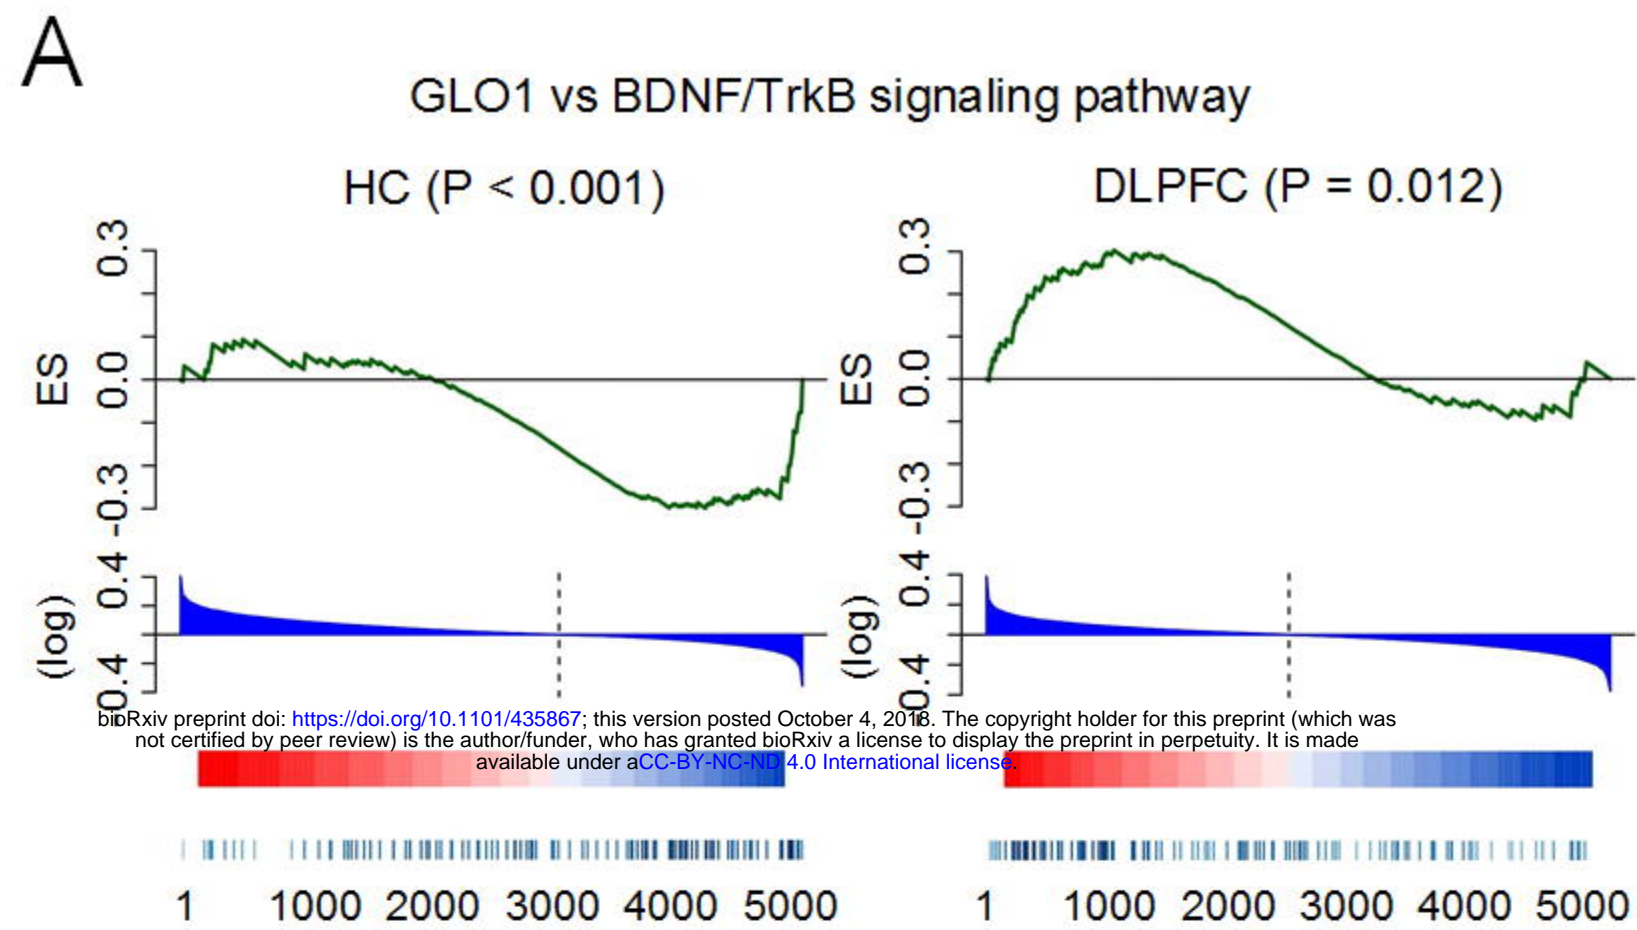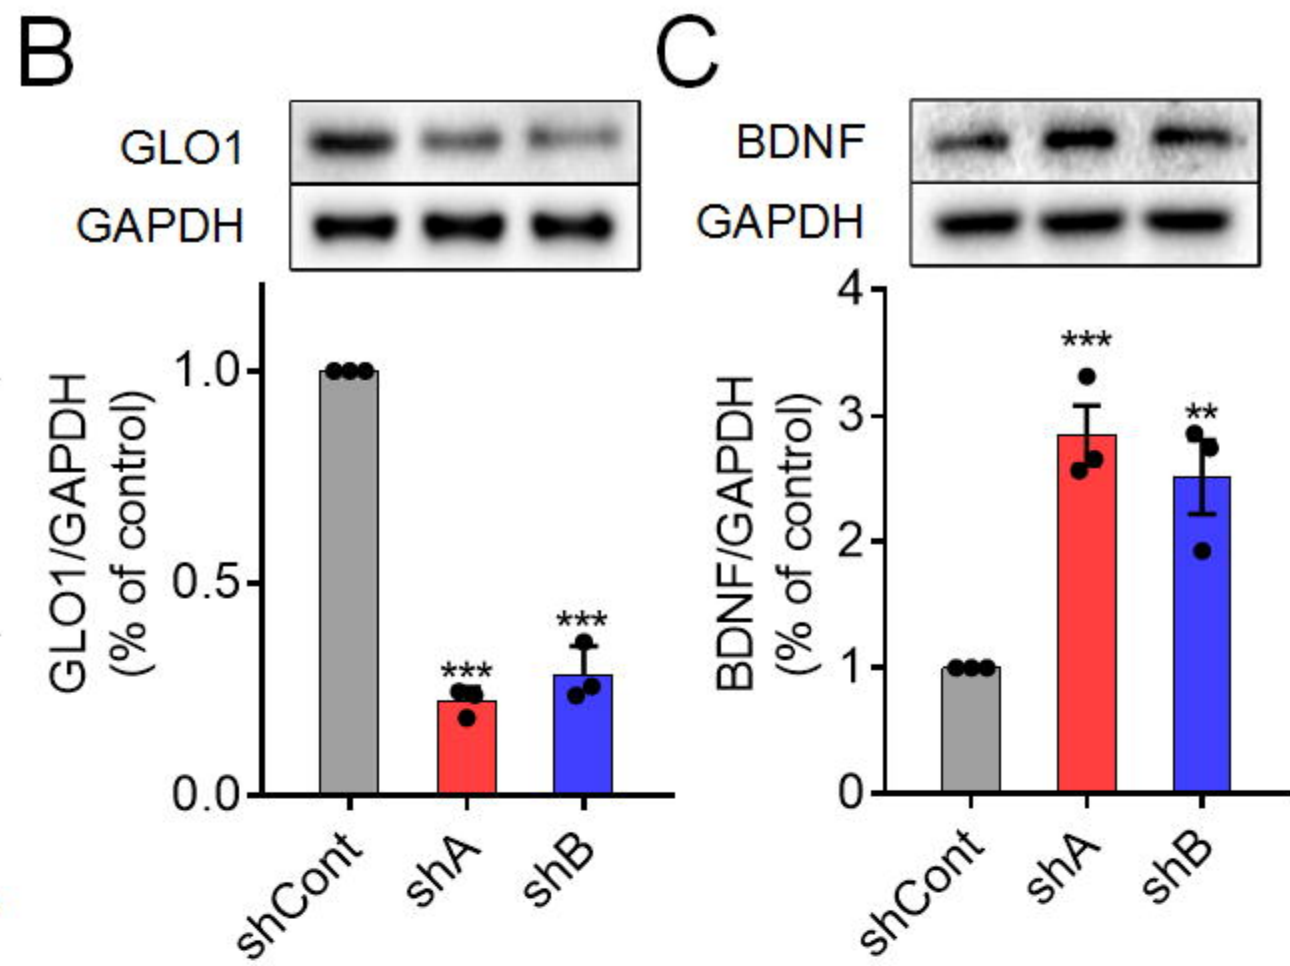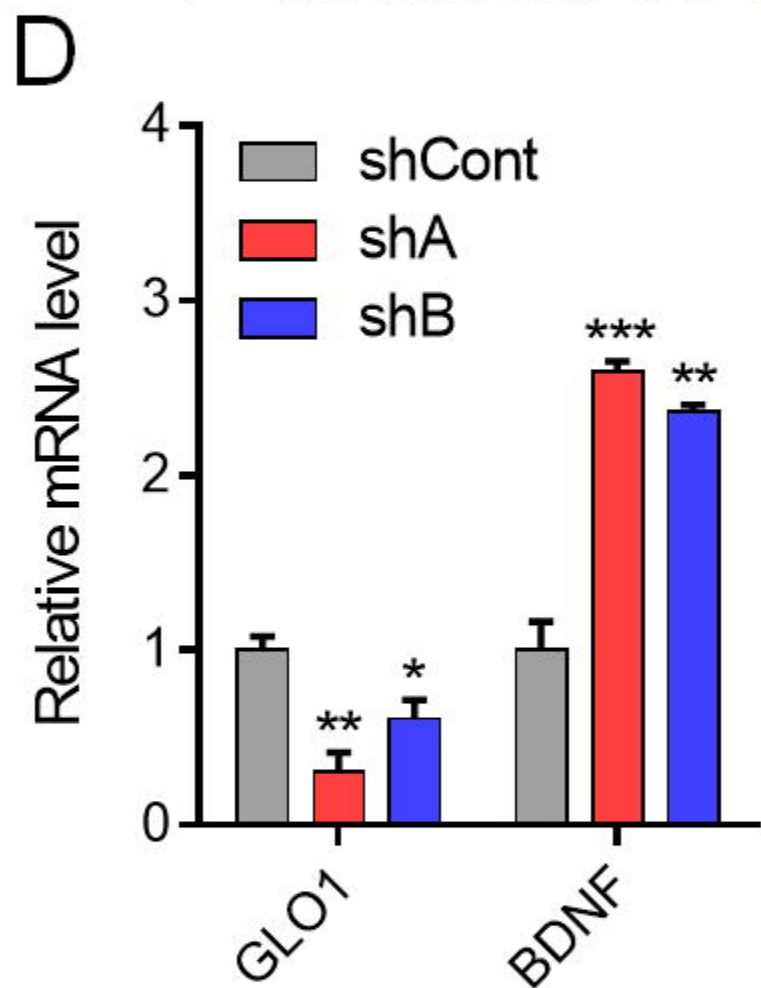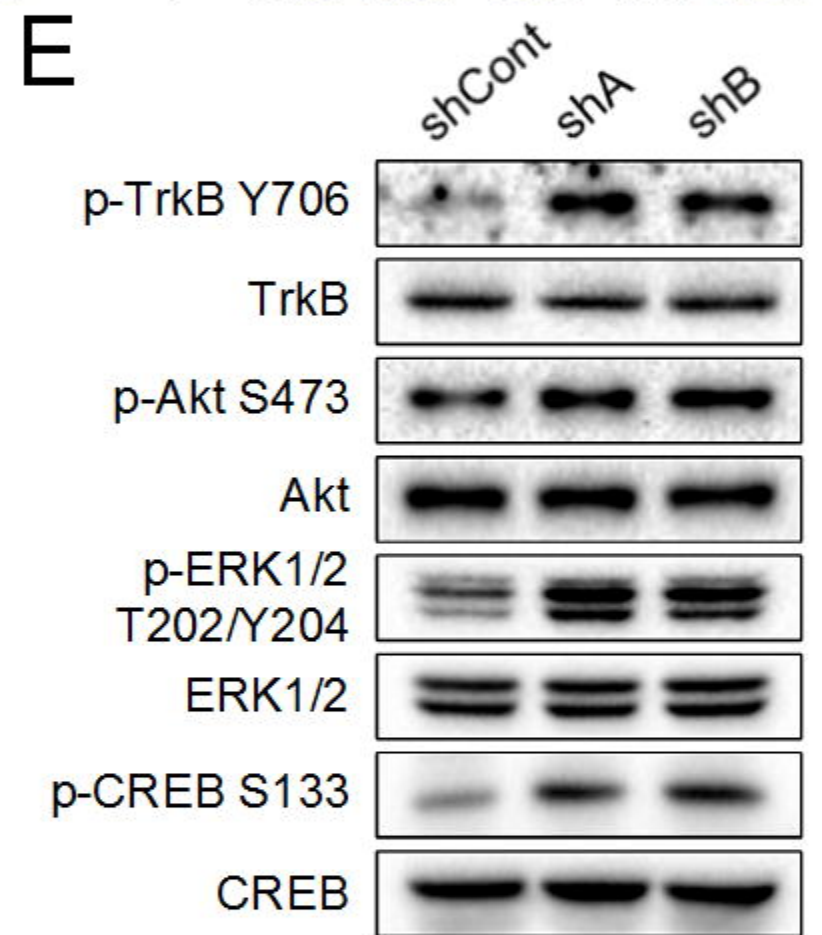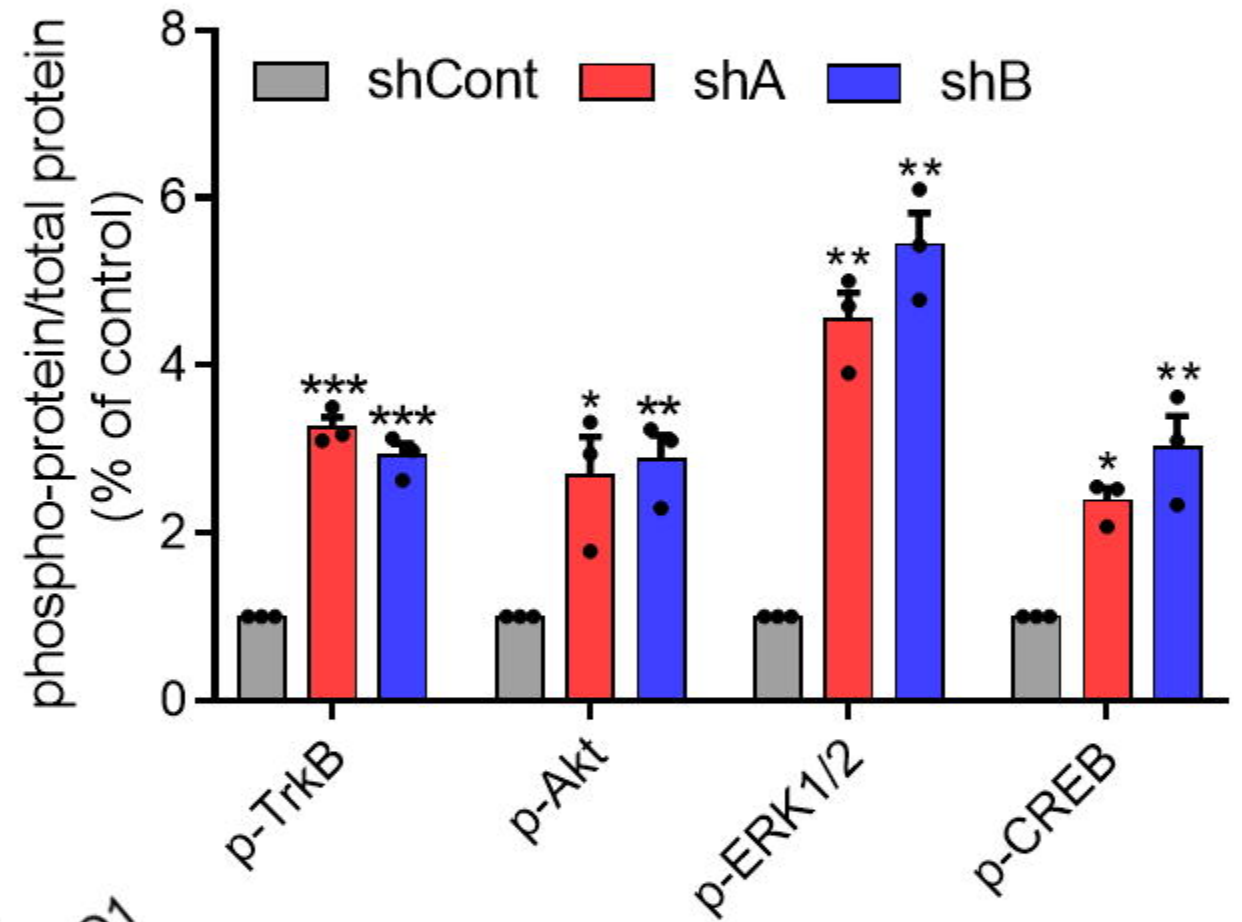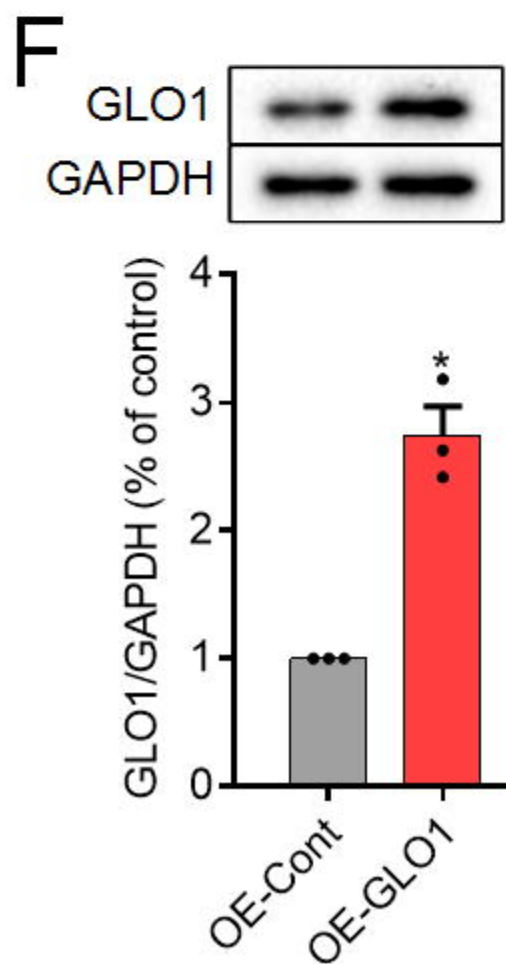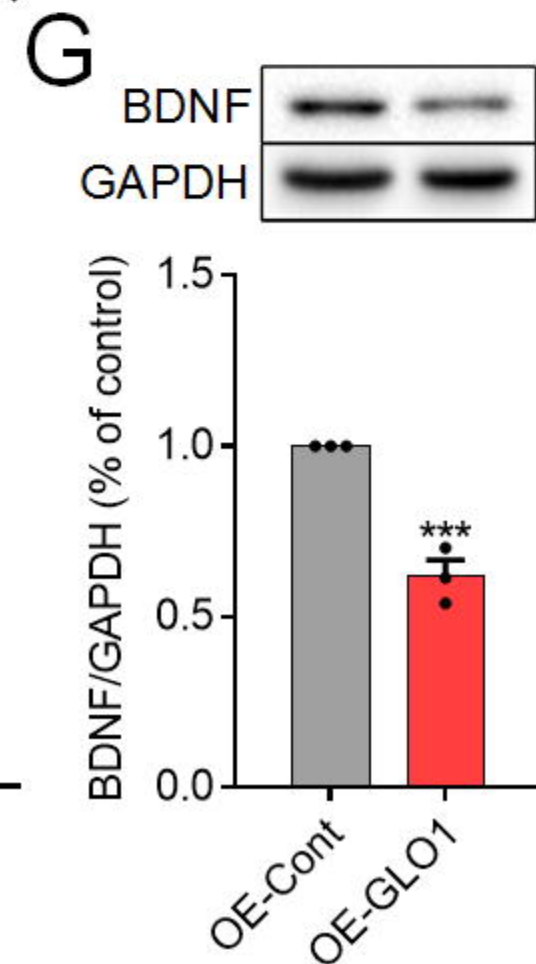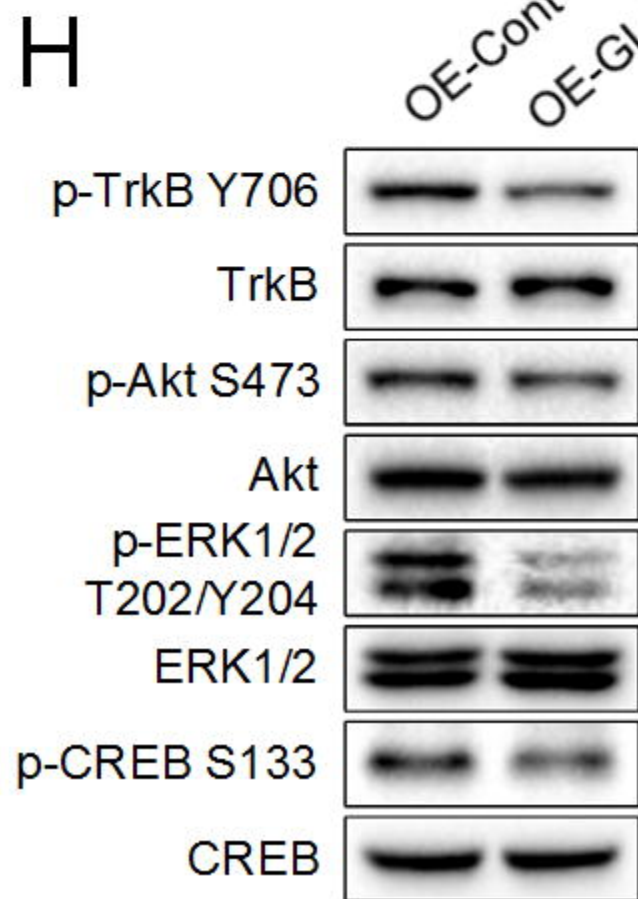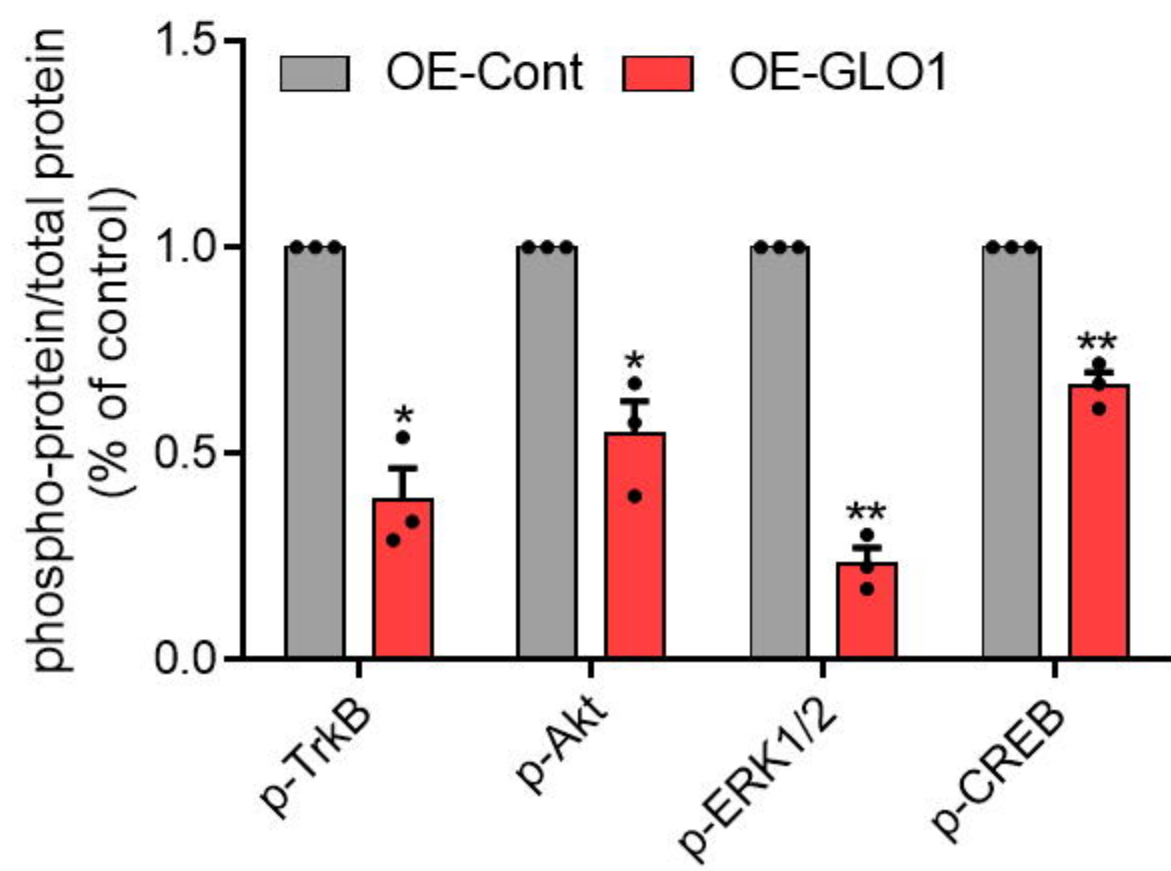



**A**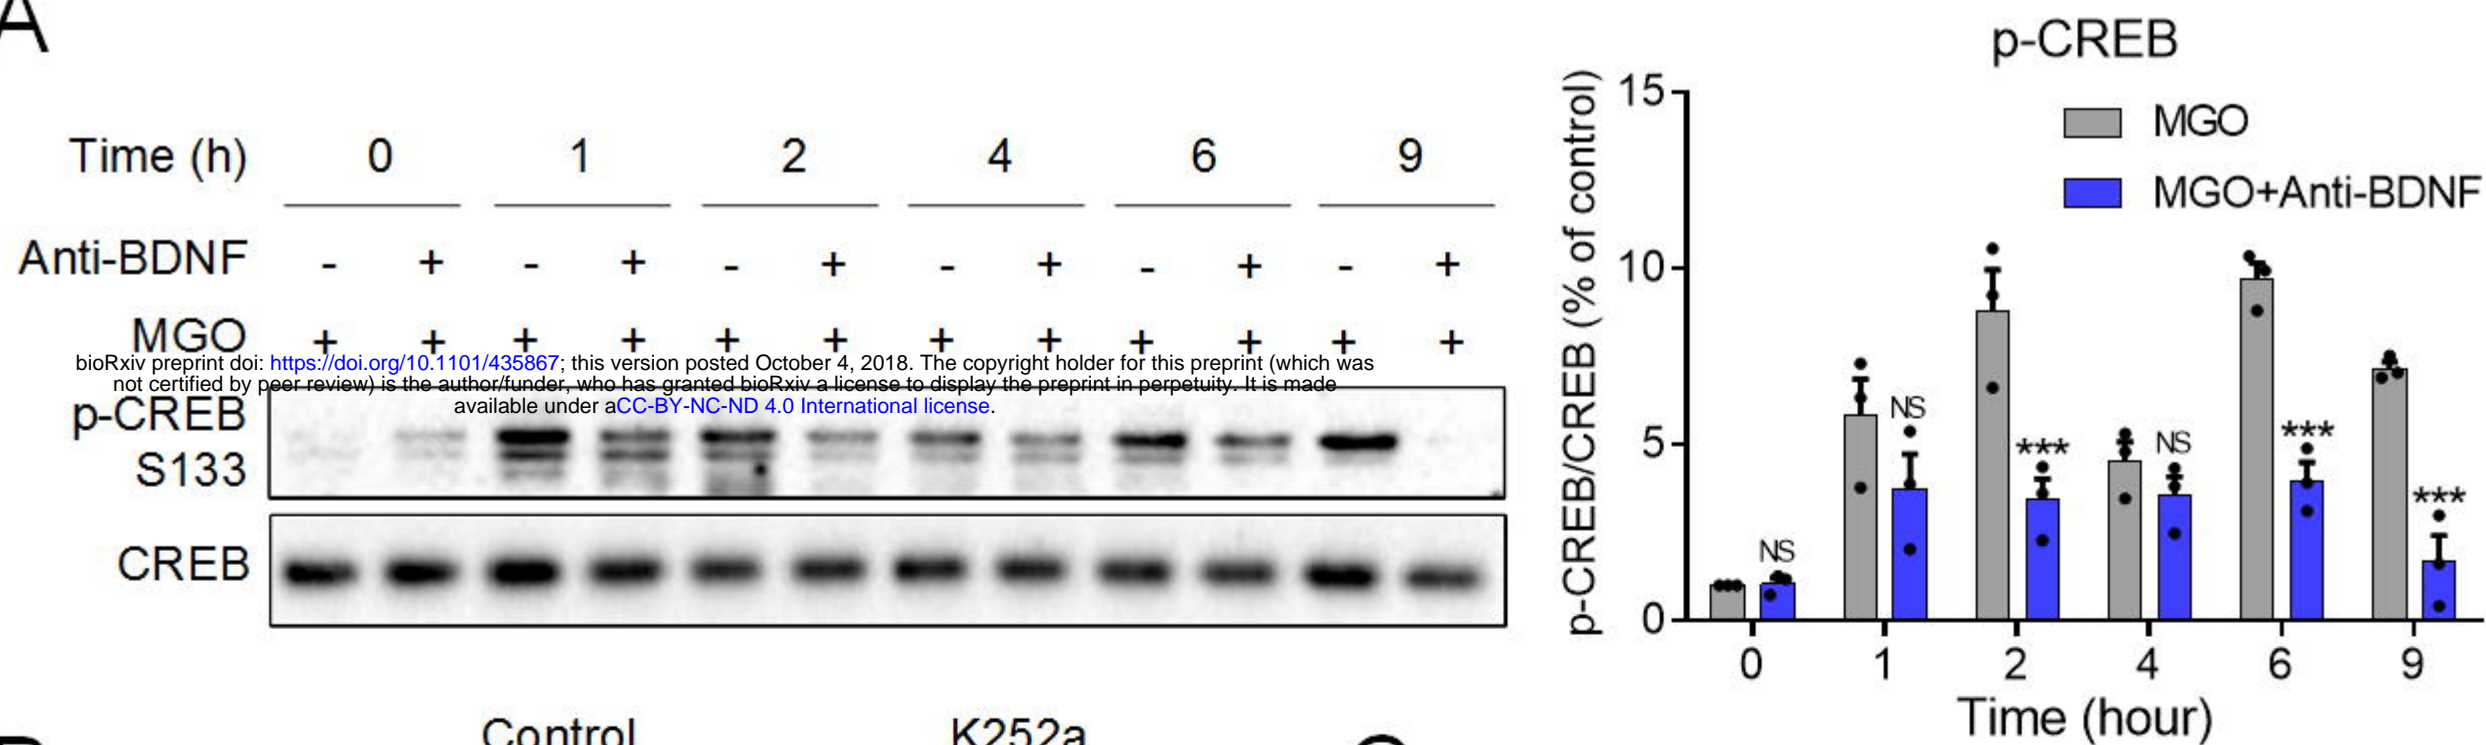**B**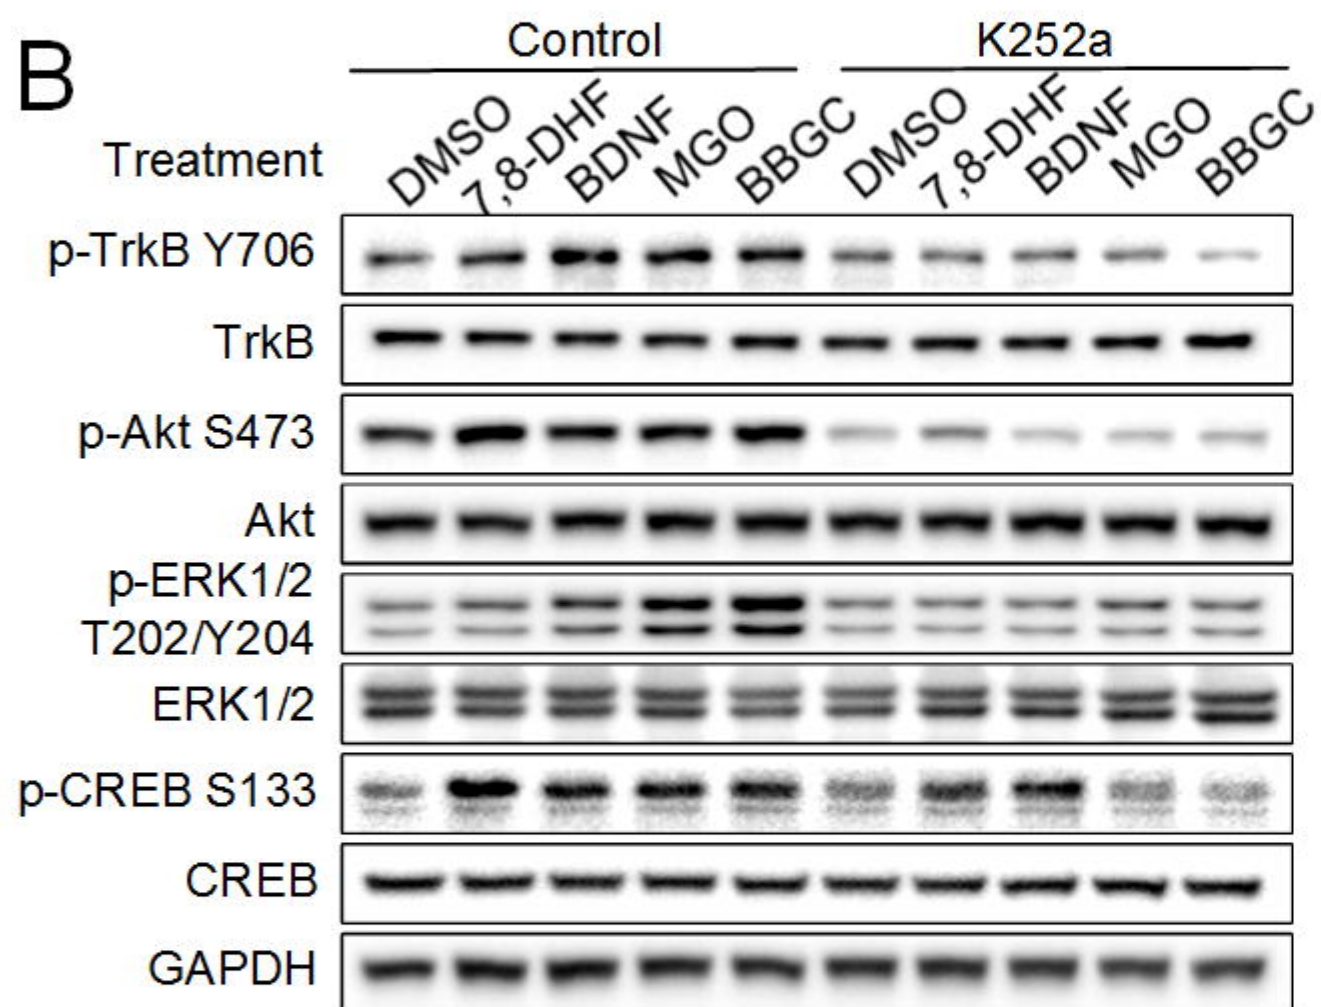**C**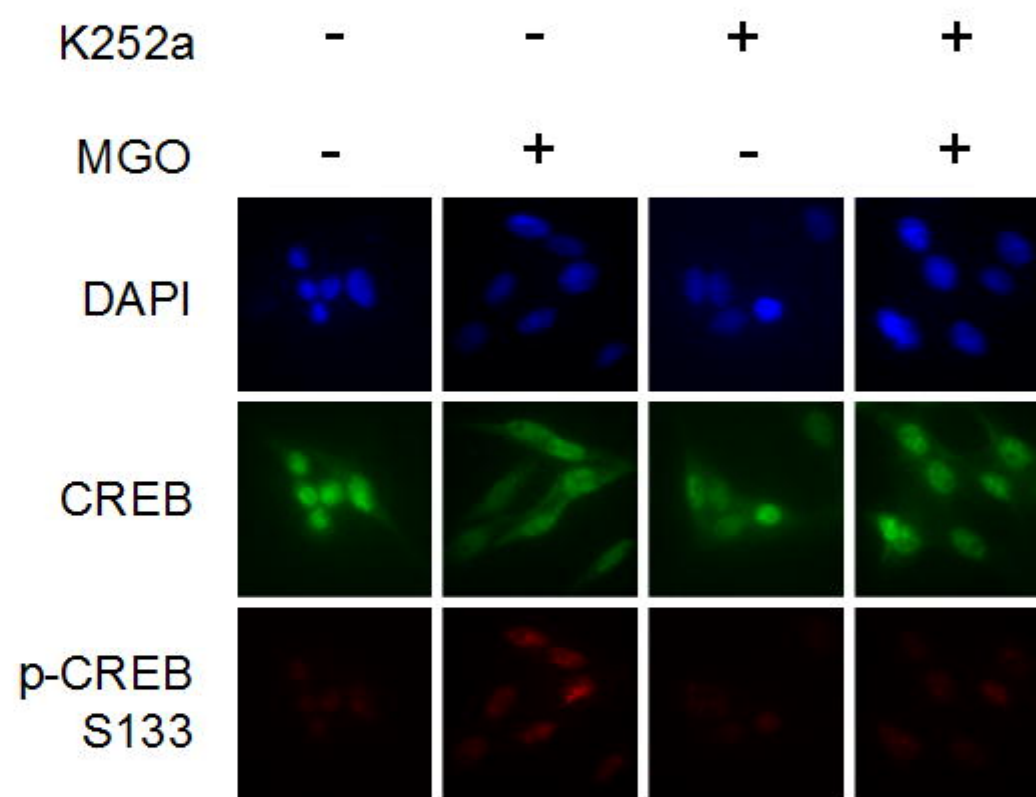**D**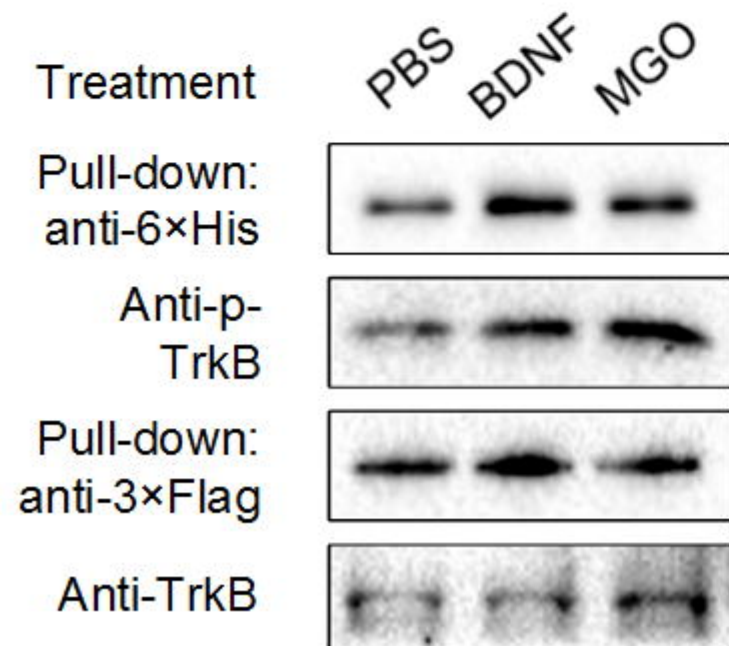**E**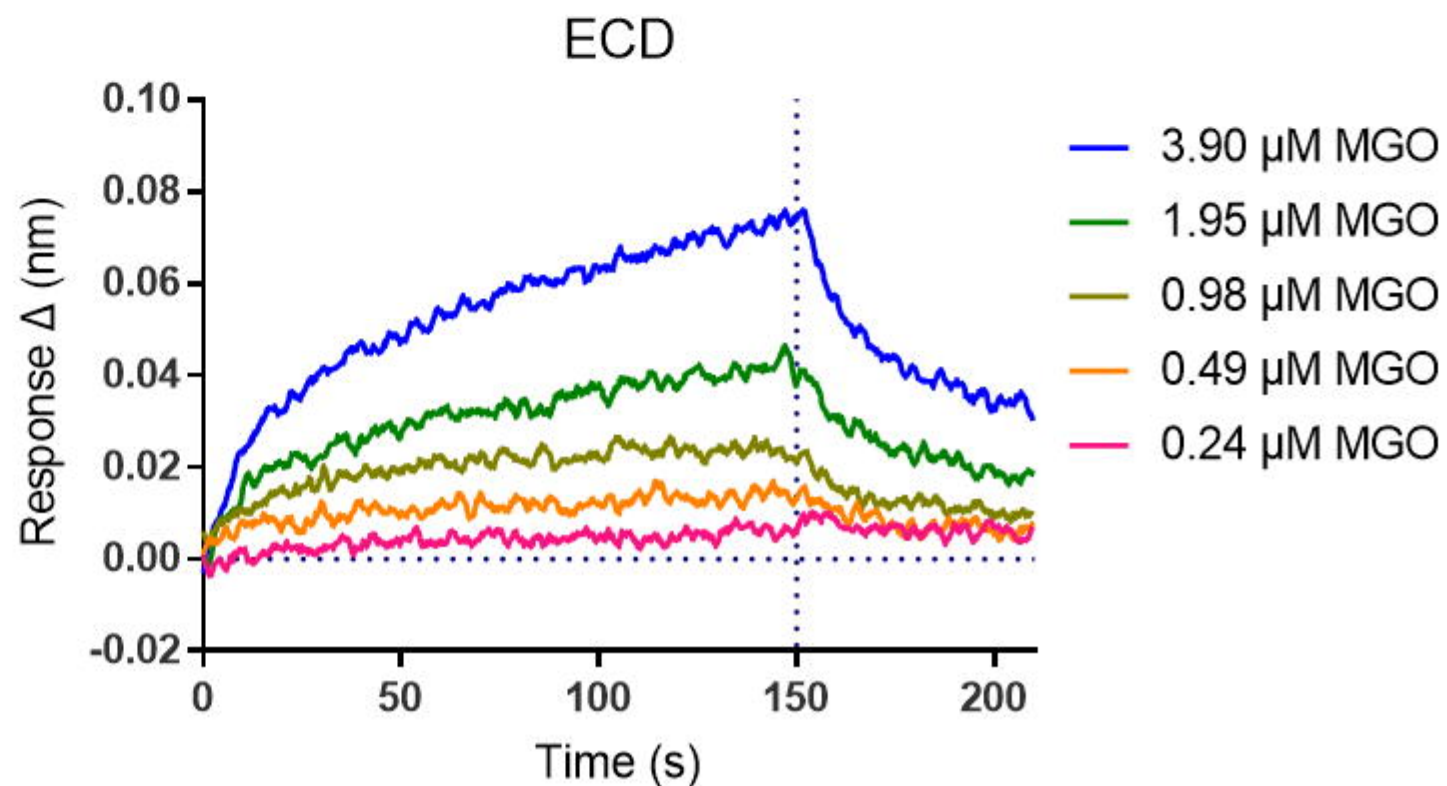



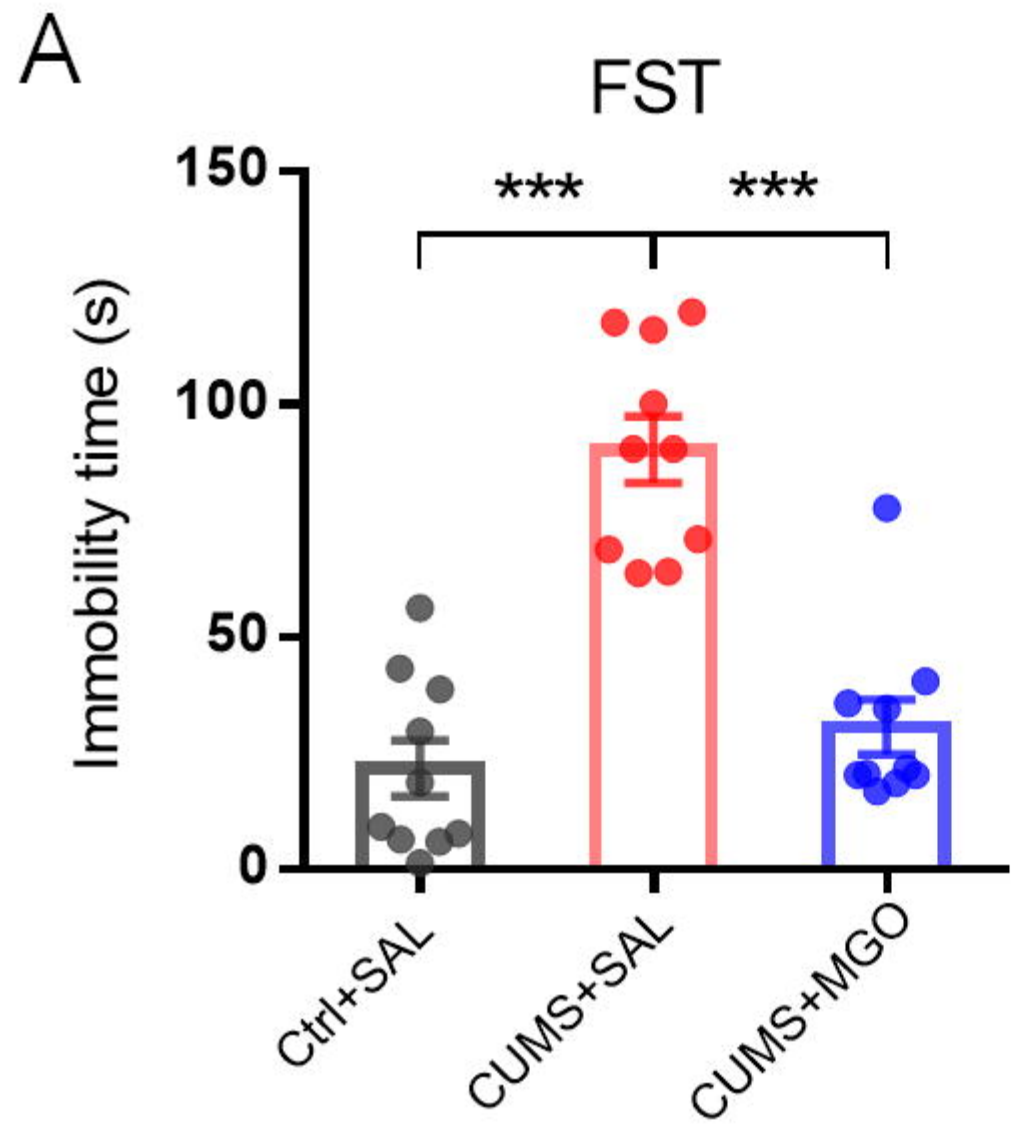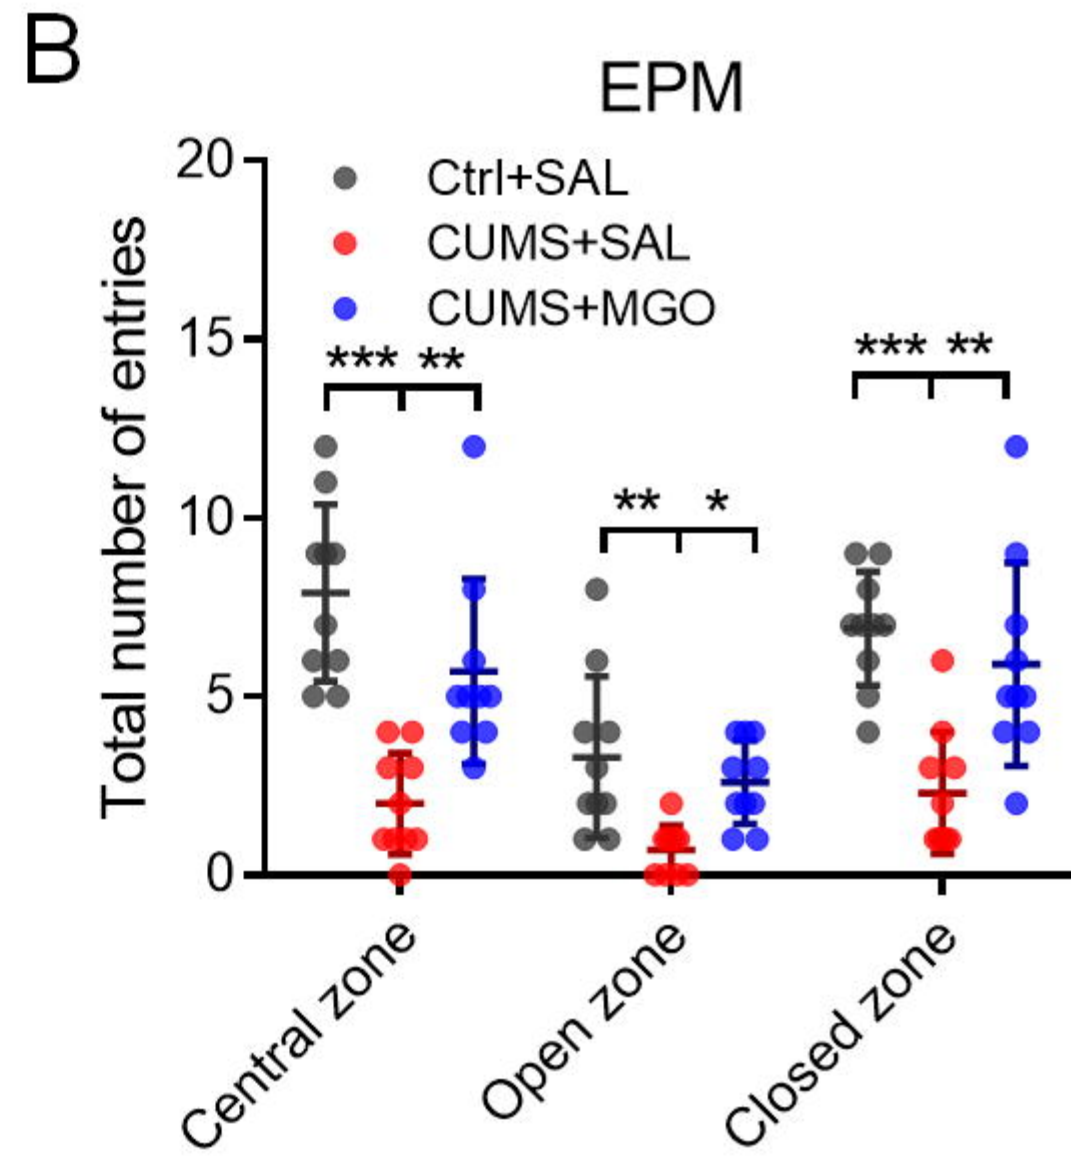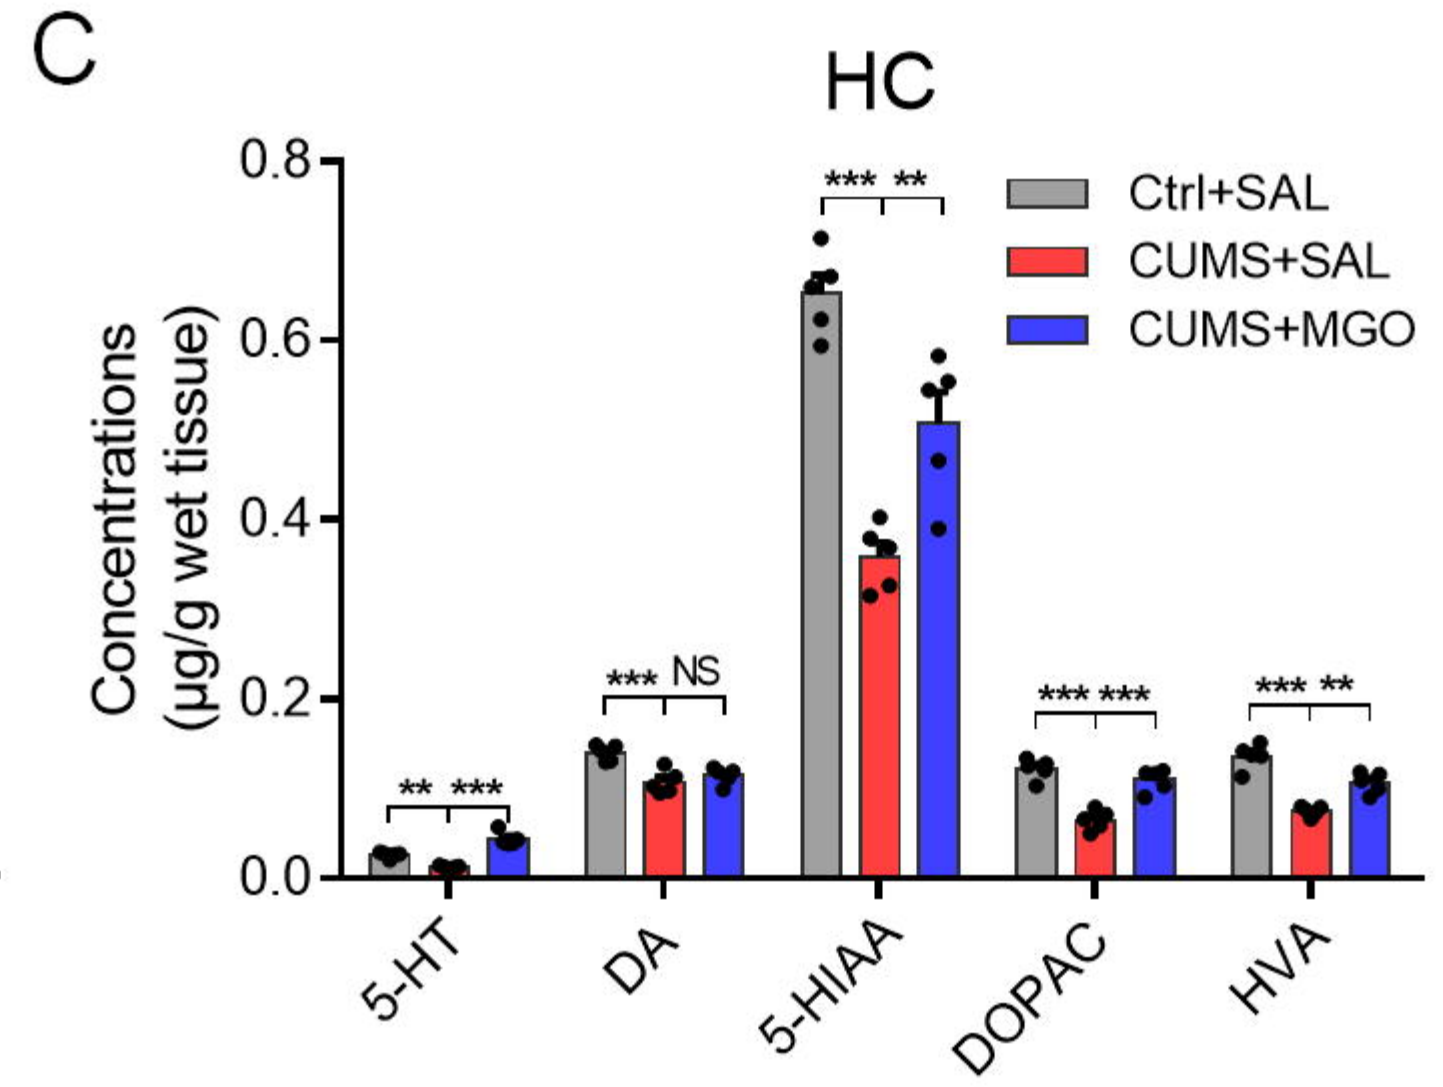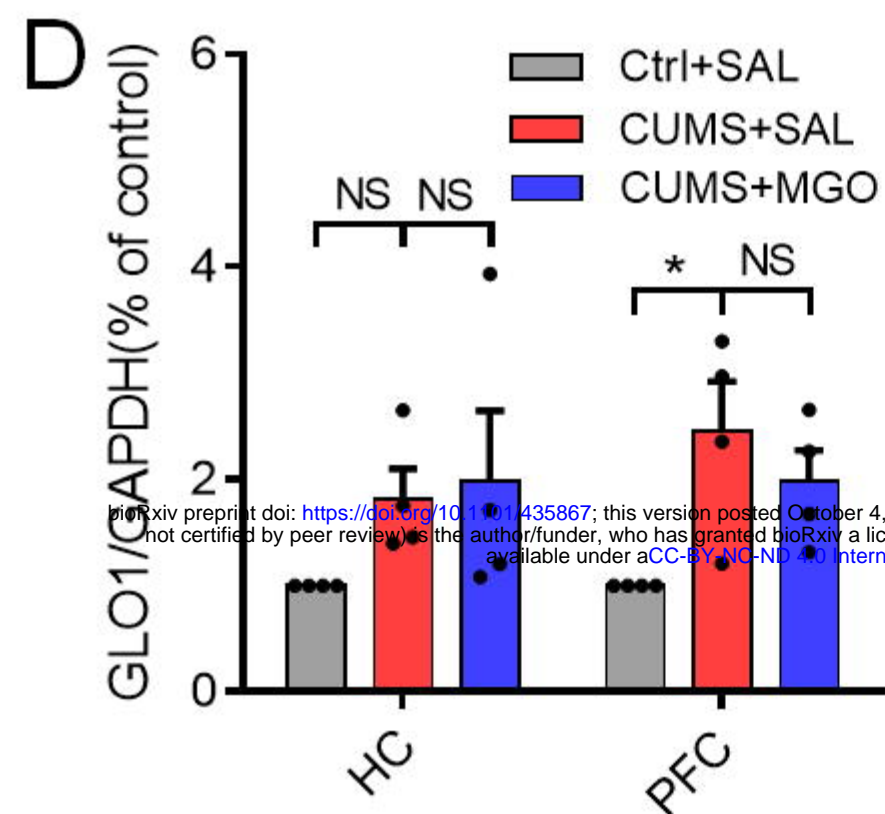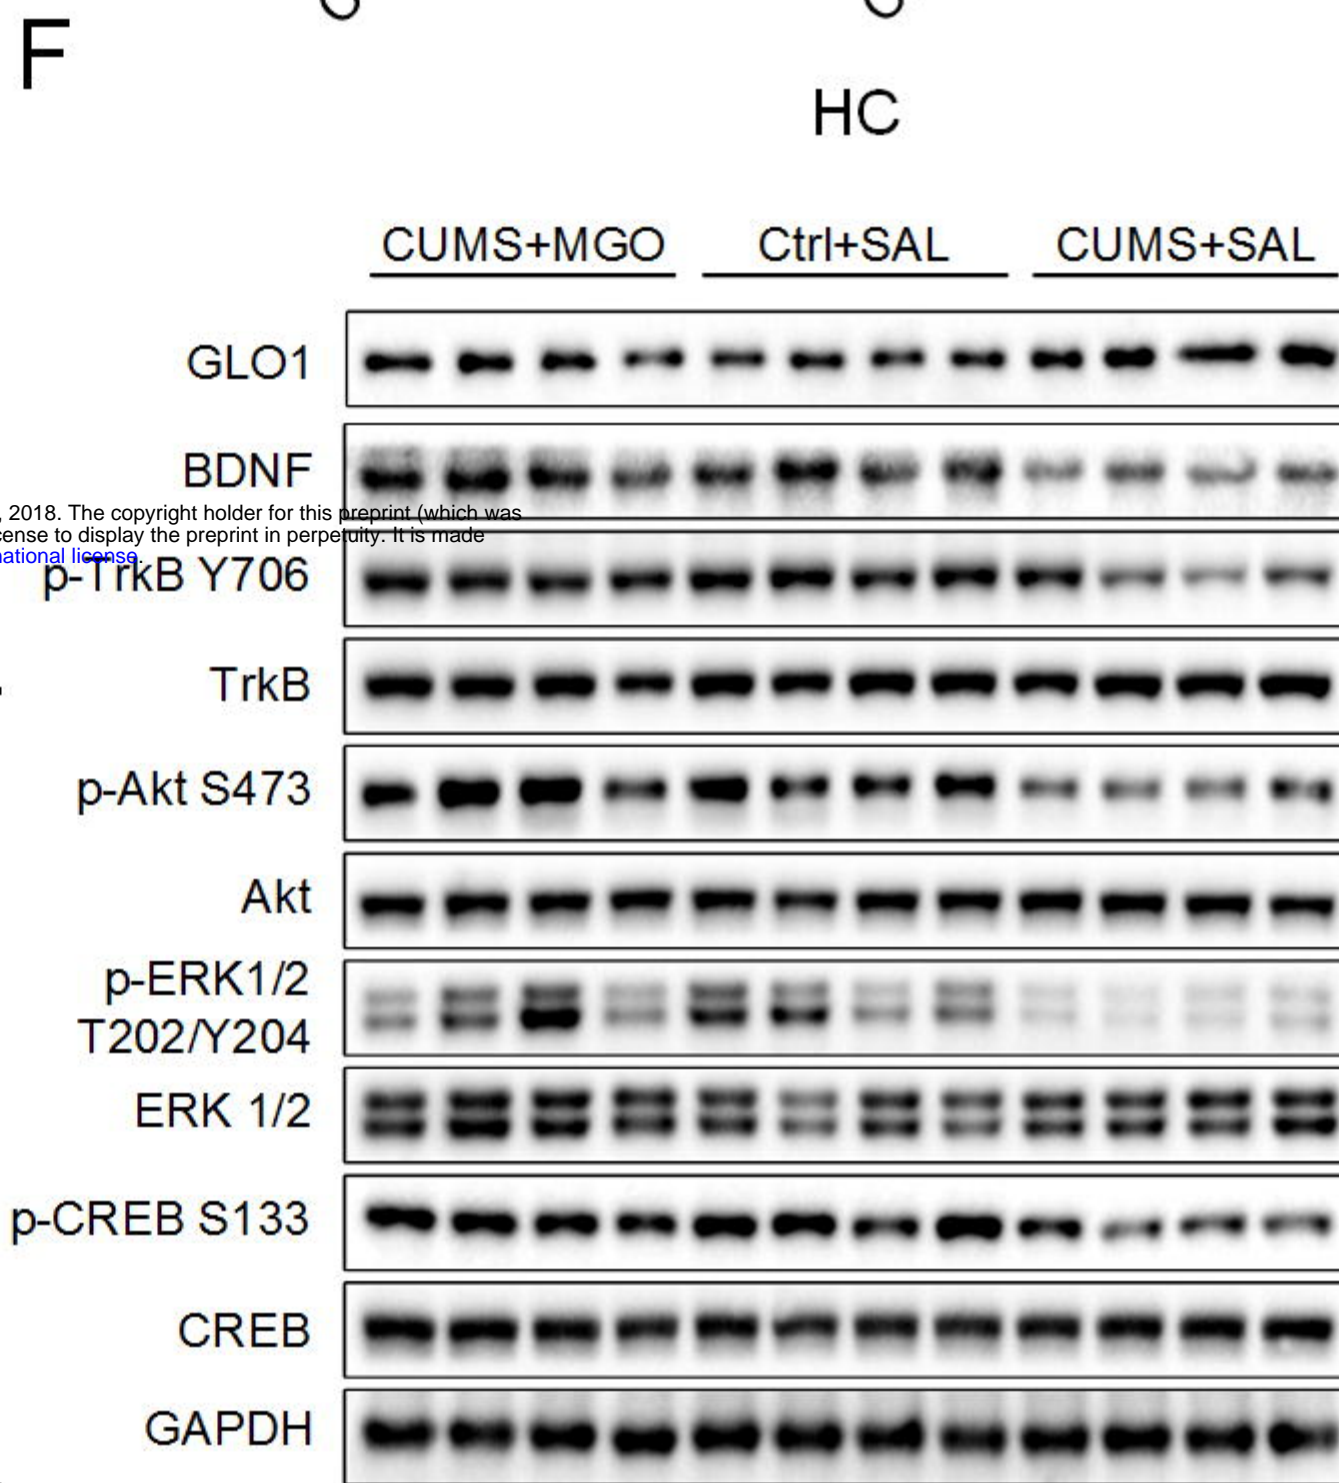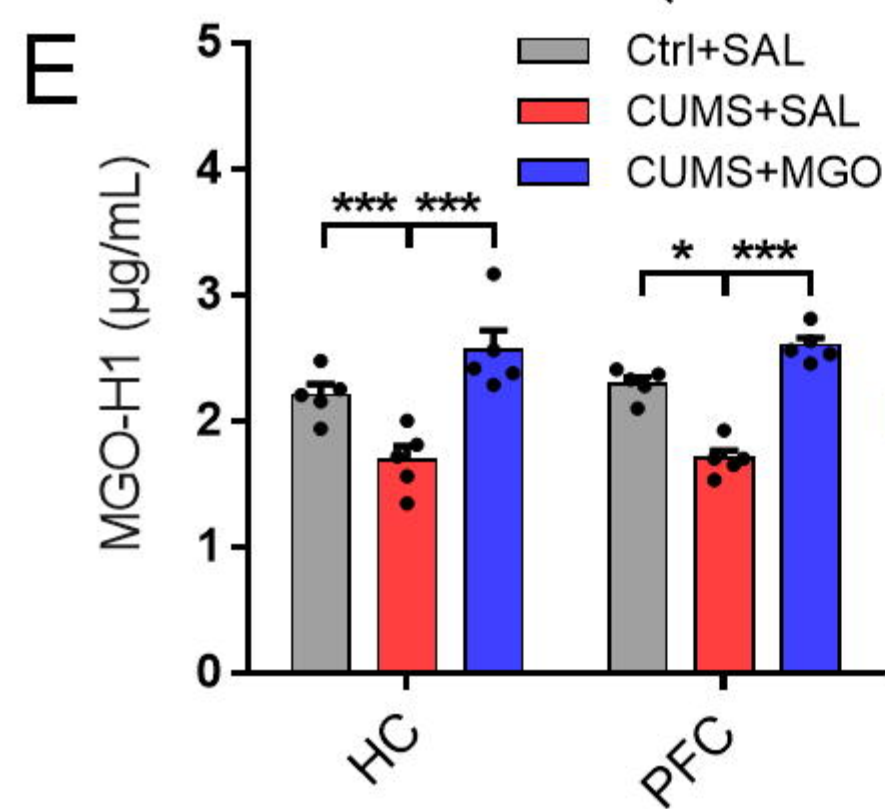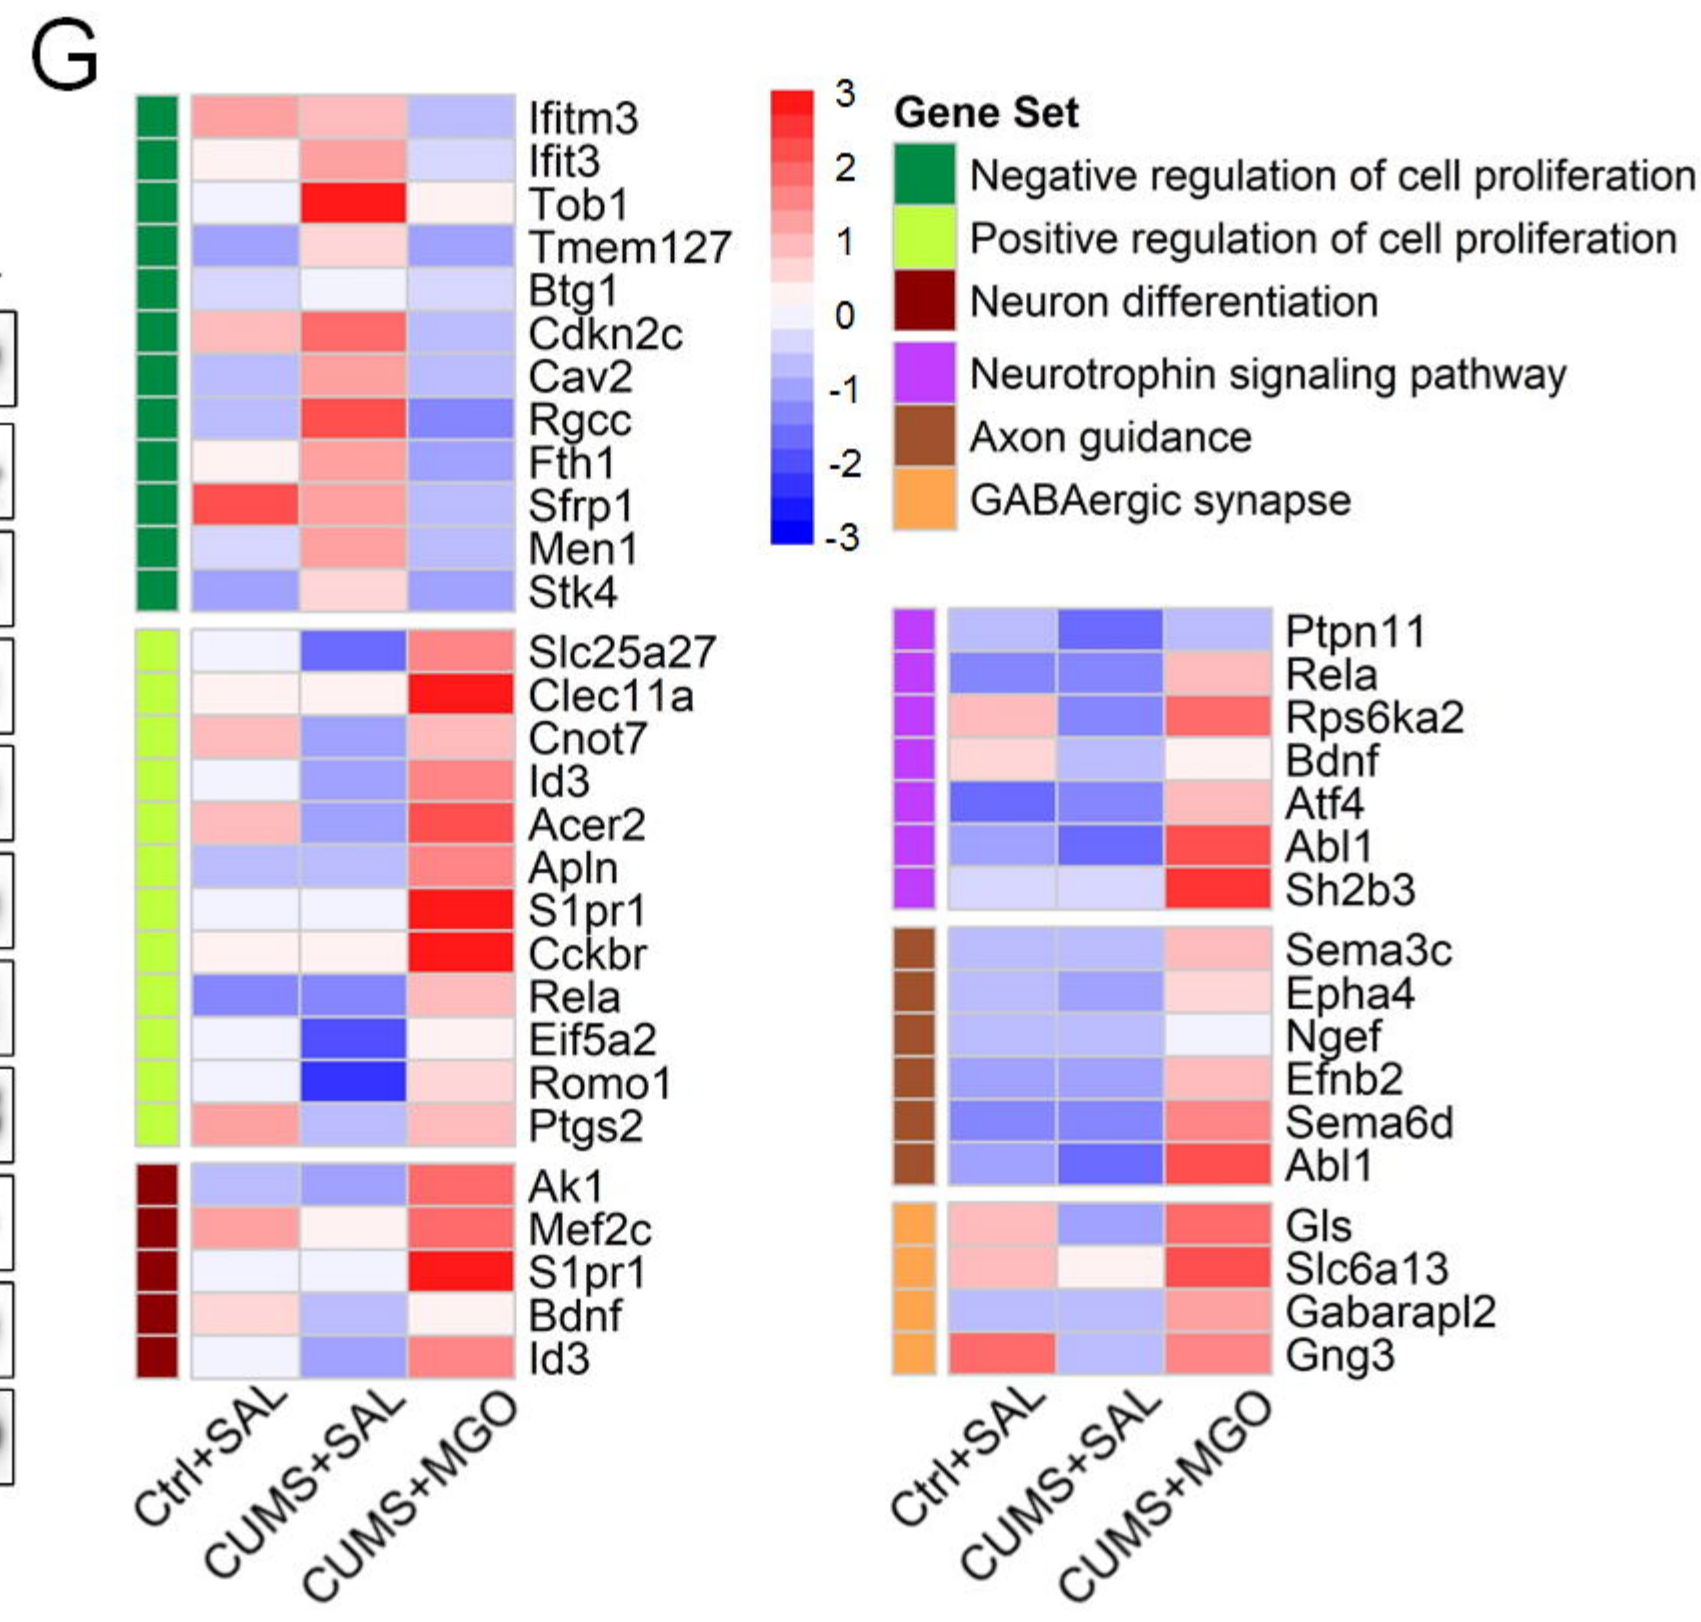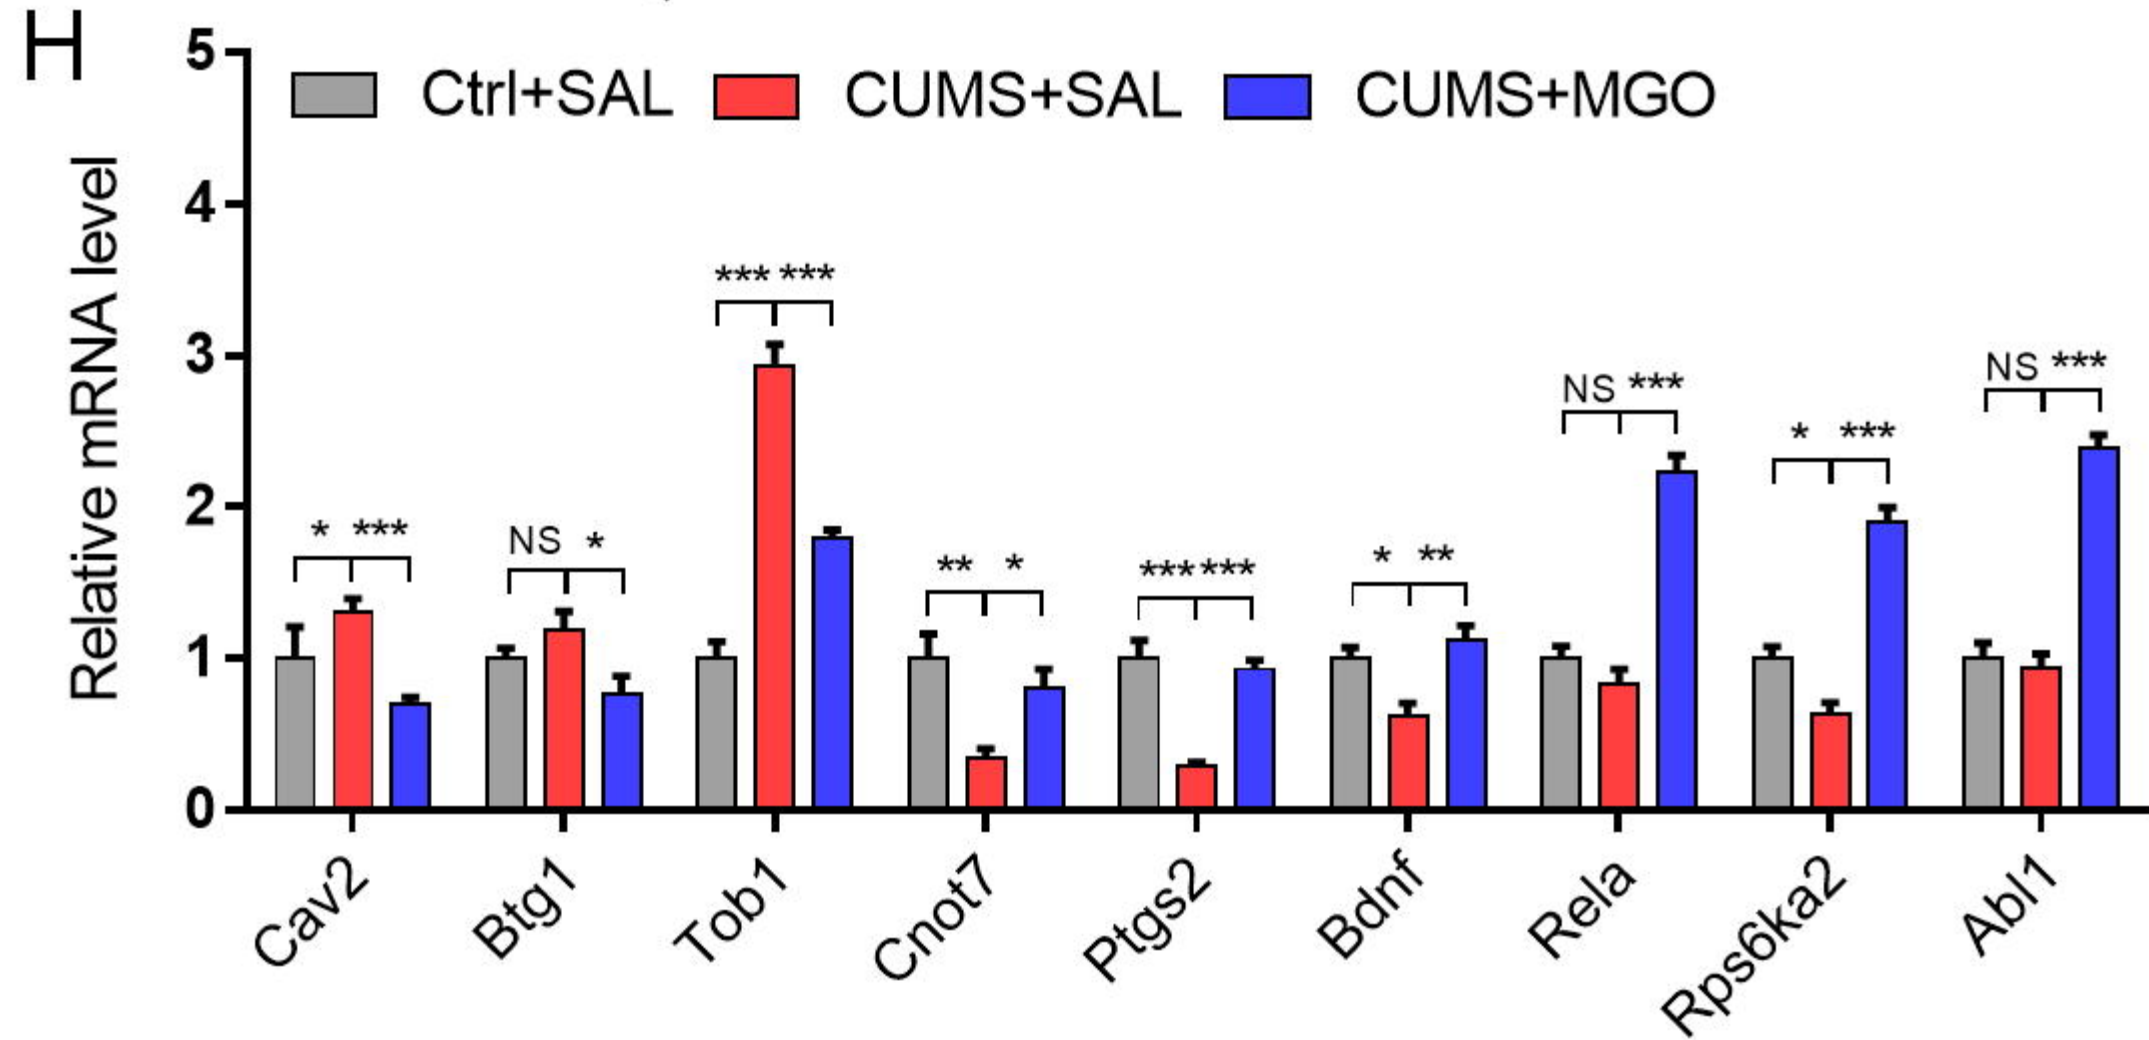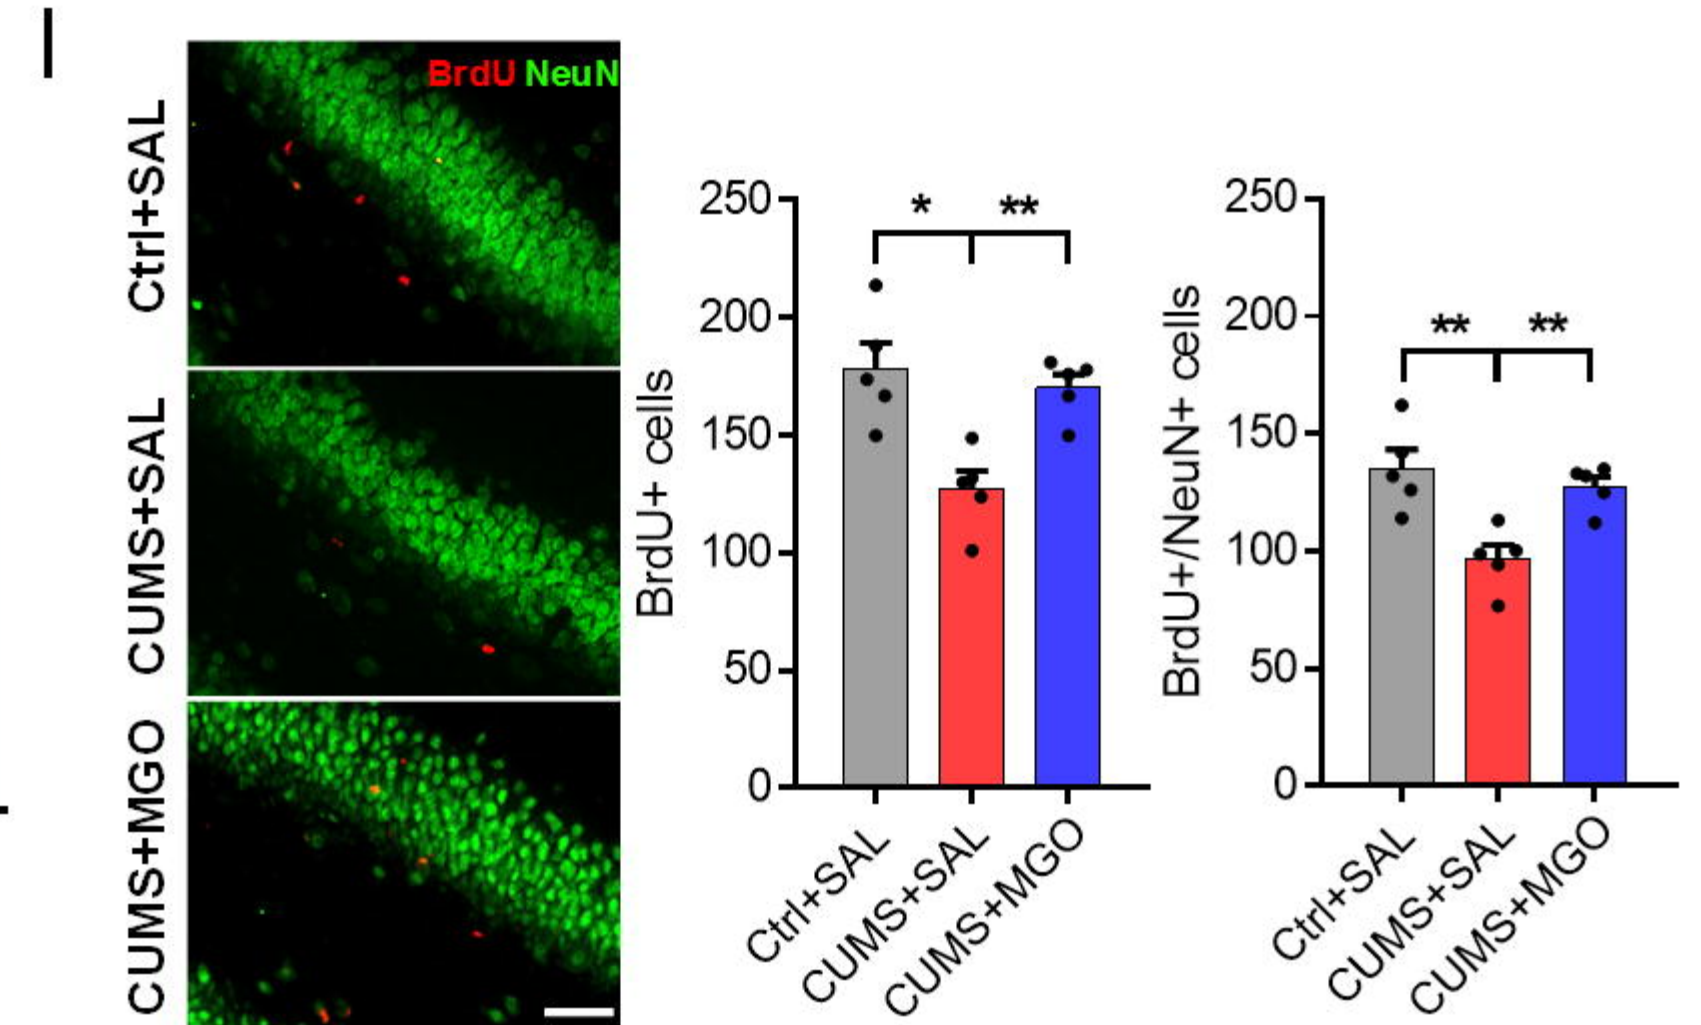



A

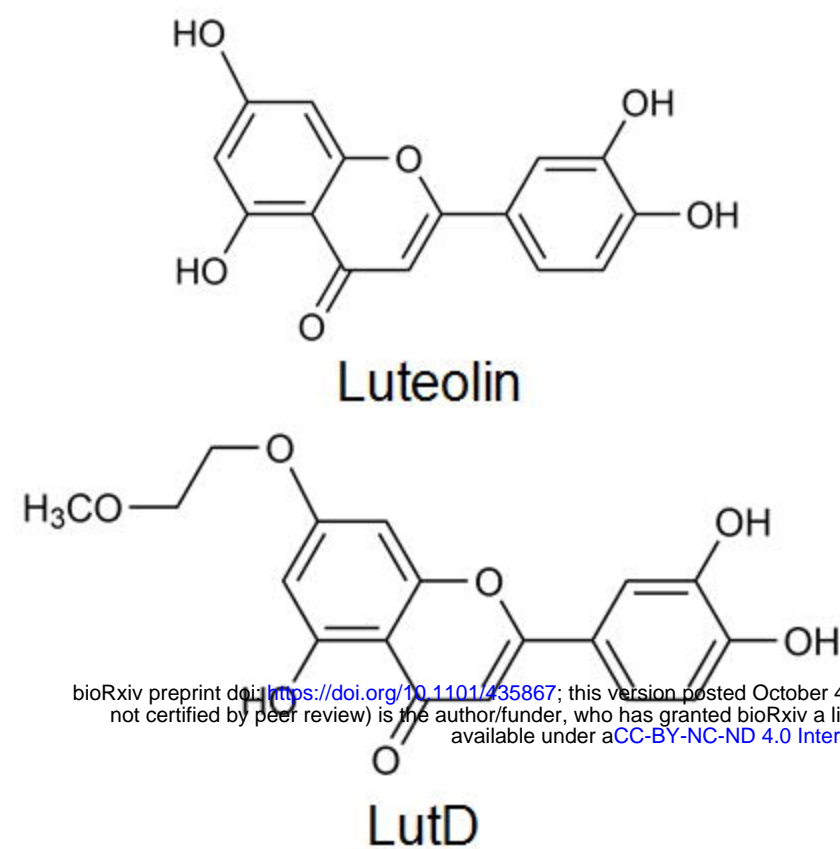

bioRxiv preprint doi: <https://doi.org/10.1101/435867>; this version posted October 4, 2018. The copyright holder for this preprint (which was not certified by peer review) is the author/funder, who has granted bioRxiv a license to display the preprint in perpetuity. It is made available under aCC-BY-NC-ND 4.0 International license.

B

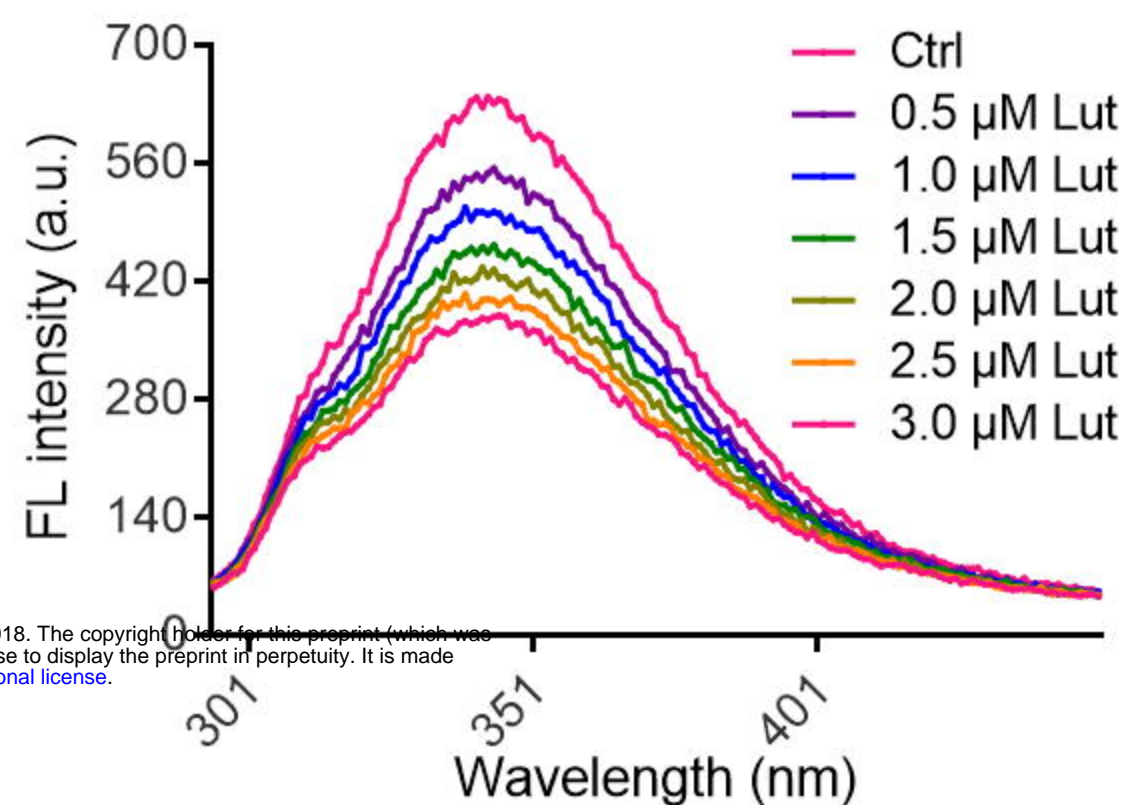

C

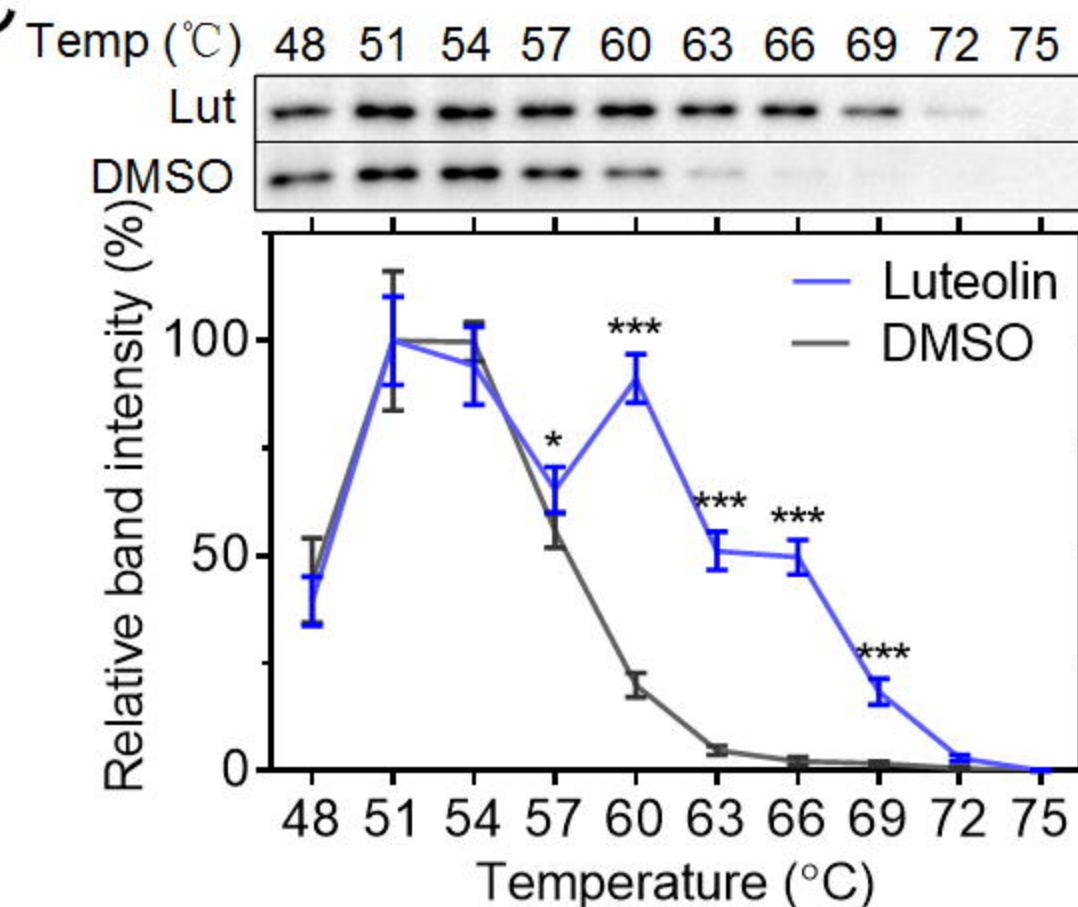

D

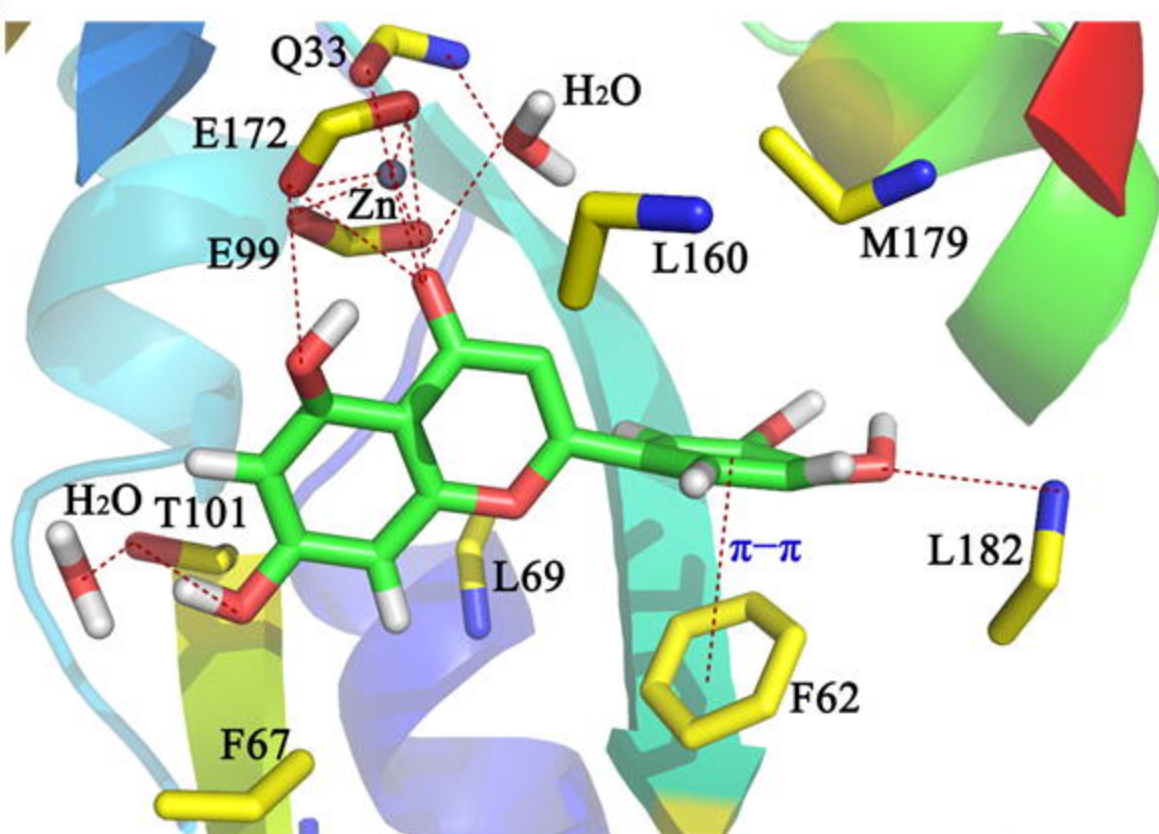

F

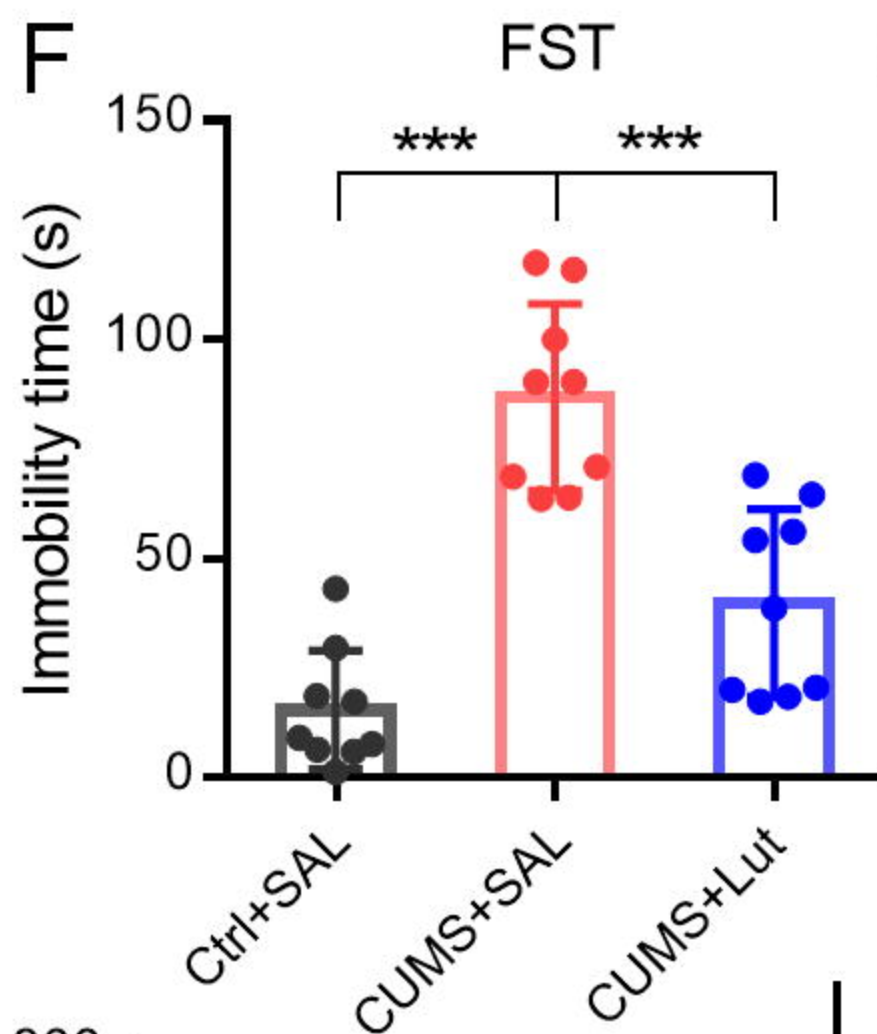

G

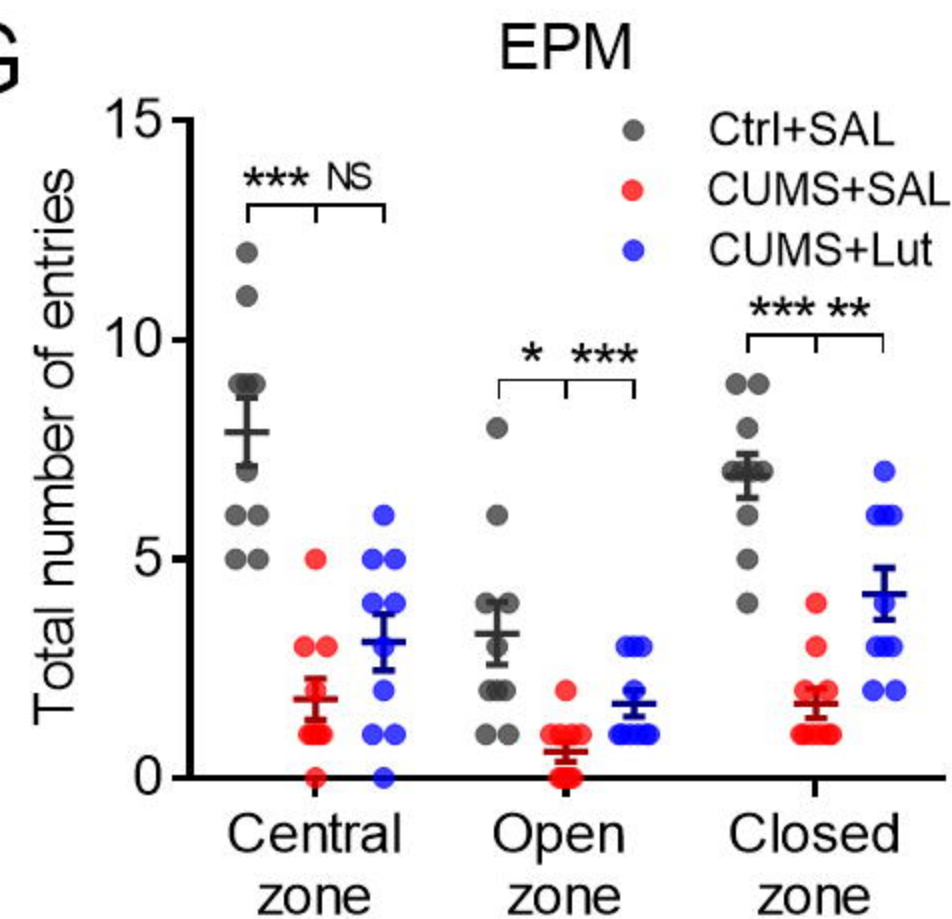

E

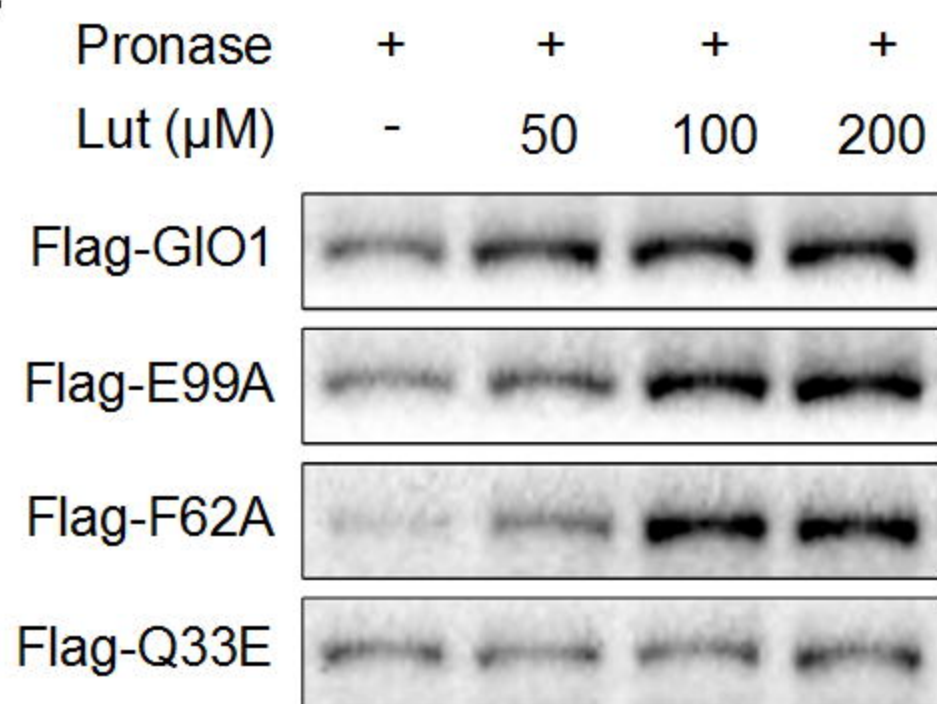

H

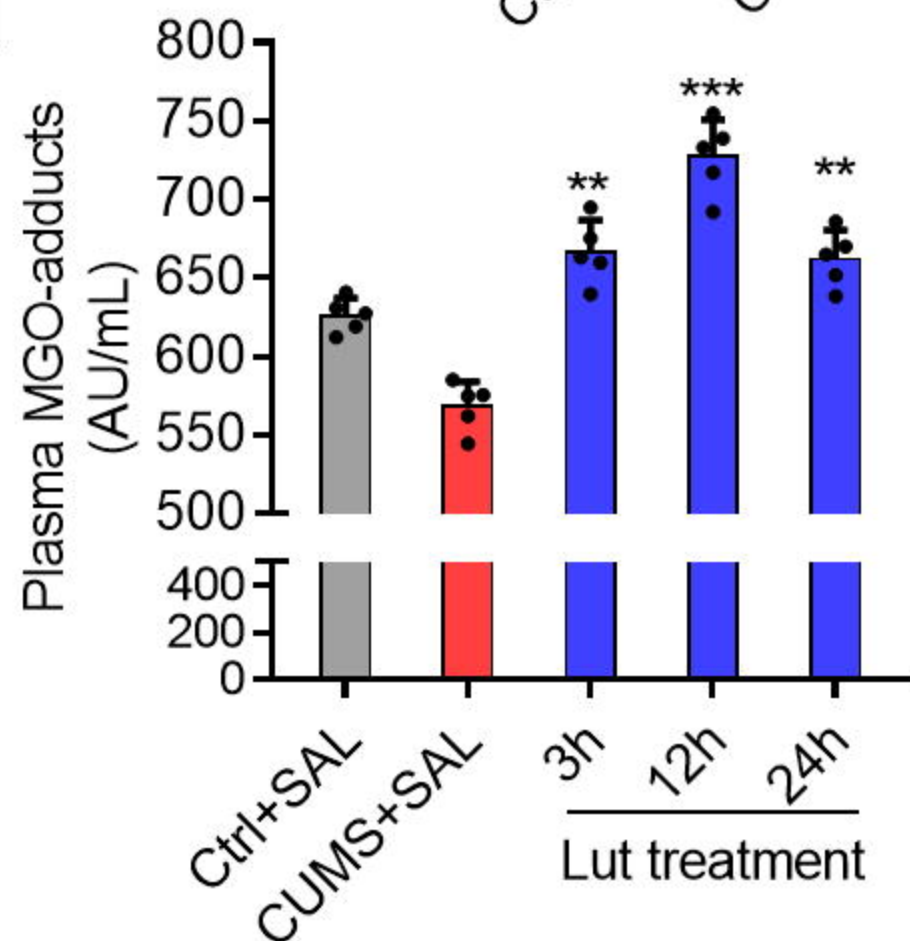

I

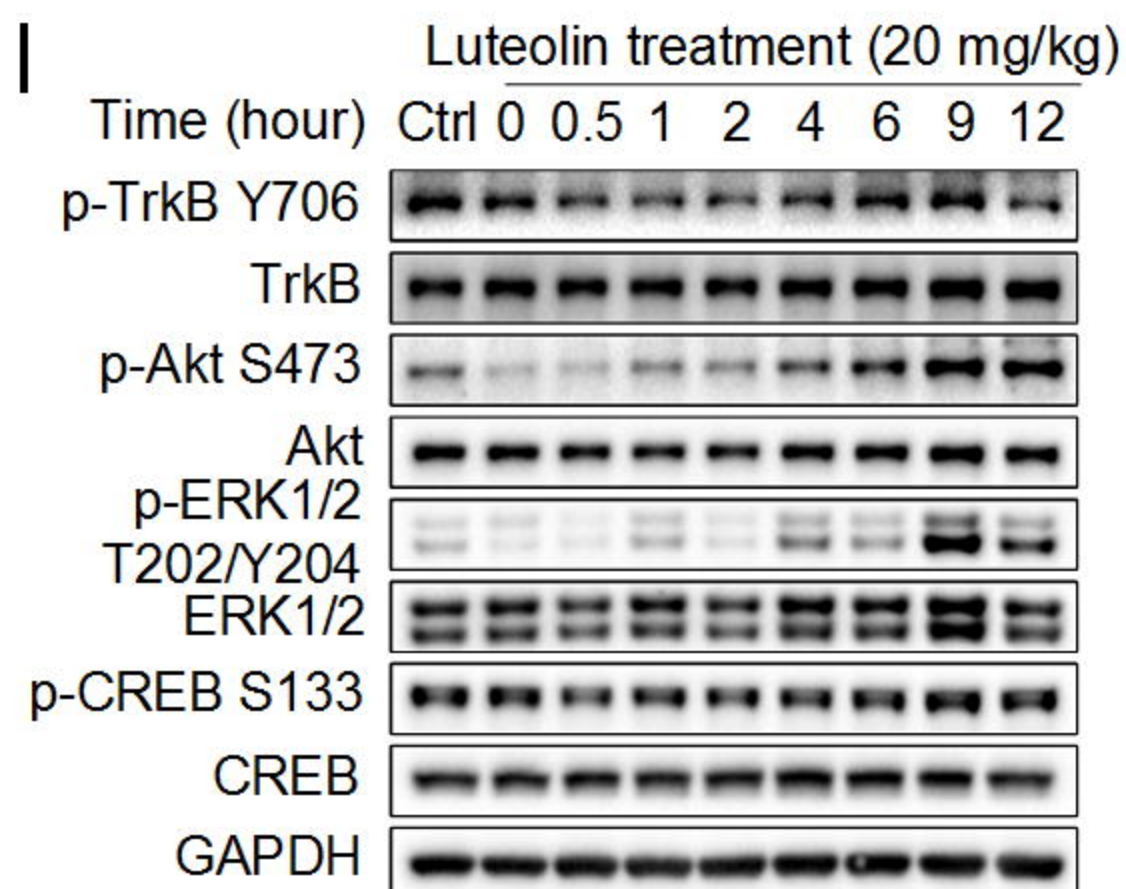



## Depression

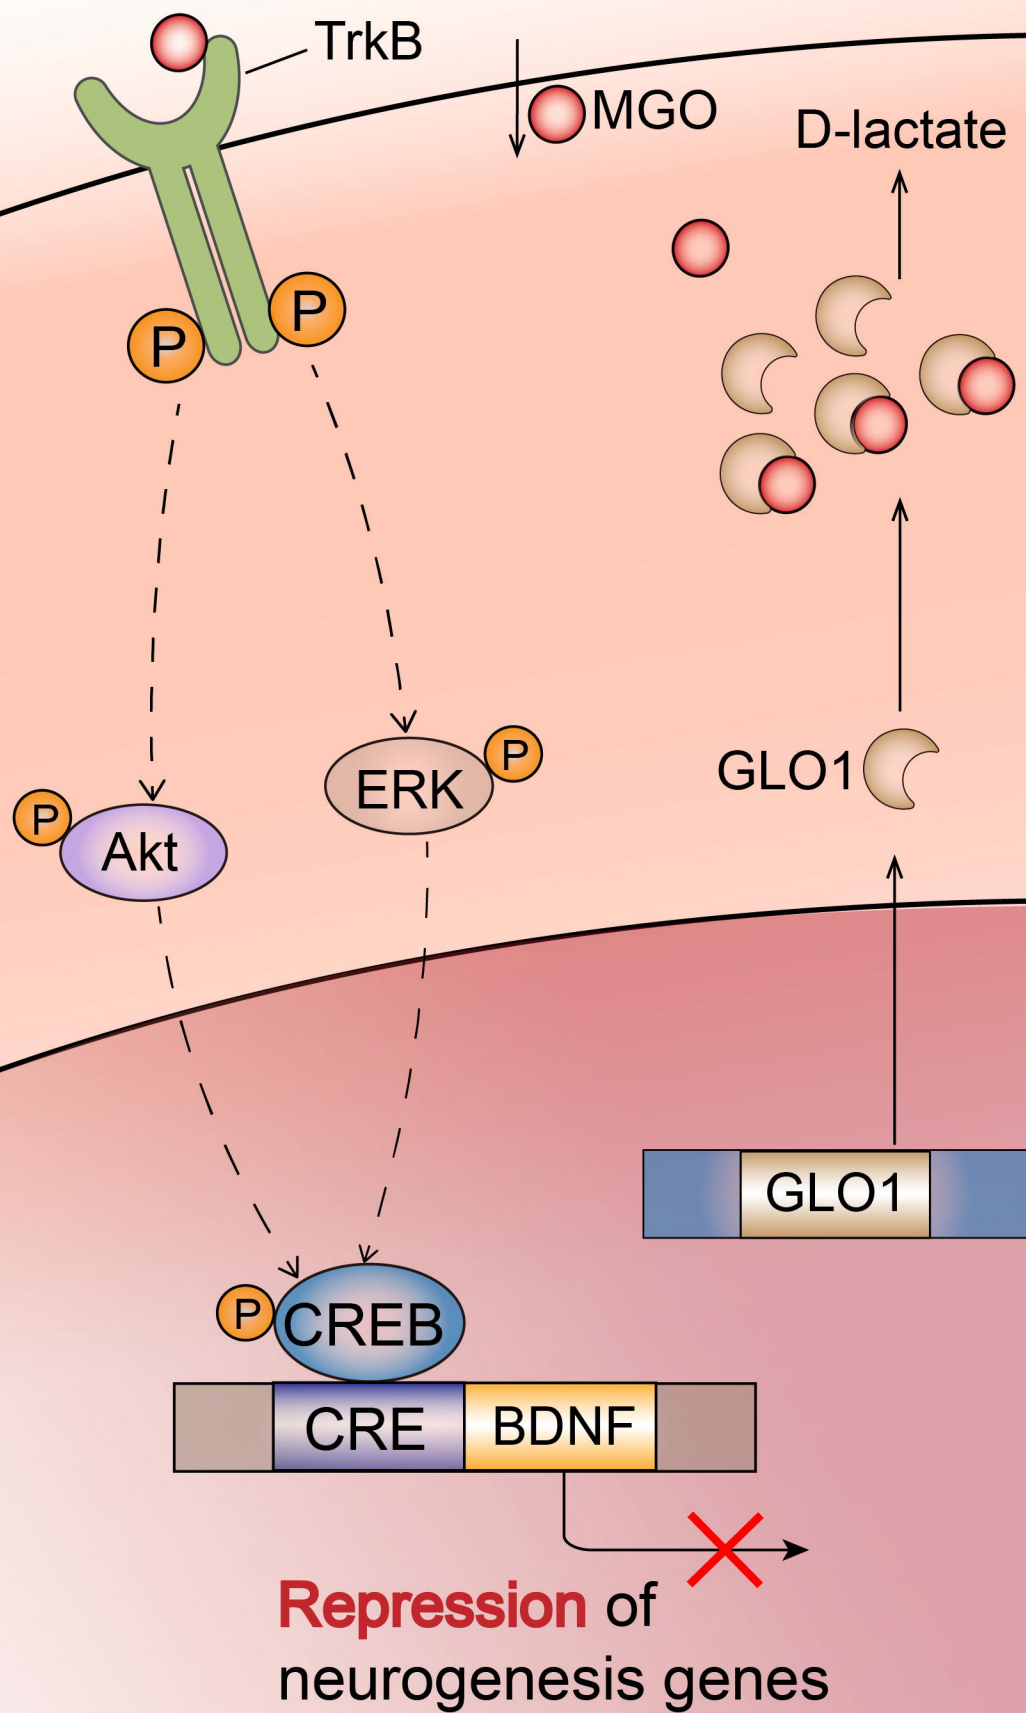

## Treatment

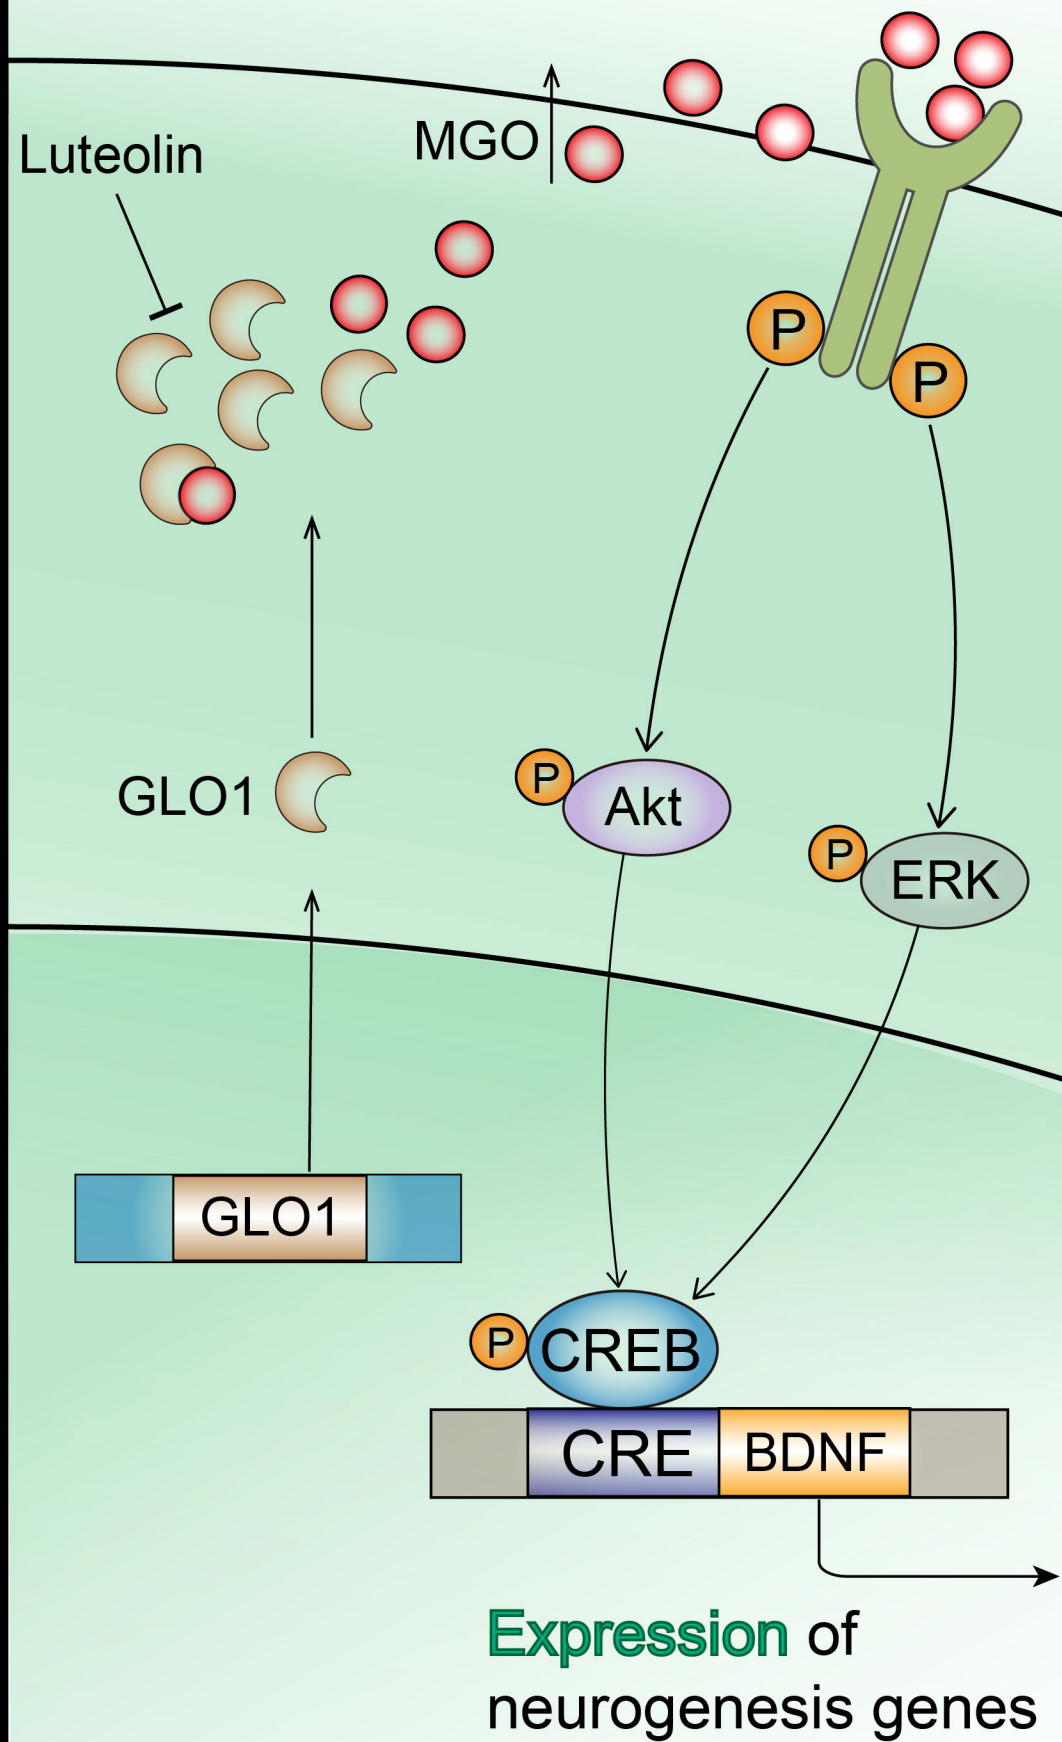

Source: http://biorxiv.org/content/10.1101/435867v1.full.pdf
